# Supplementary material for: Impact of myalgic encephalomyelitis/chronic fatigue syndrome (ME/CFS) on the quality of life of people with ME/CFS and their partners and family members: an online cross-sectional survey
Source: PubMed Central journal article supplement — BMJ Open. 2022 May 2;12(5):e058128. doi: 10.1136/bmjopen-2021-058128 (PMC9062824; doi:10.1136/bmjopen-2021-058128), 2022-05-02
Supplement: bmjopen-2021-058128.draft_revisions.pdf [file bmjopen-2021-058128.draft_revisions.pdf]

# BMJ Open

BMJ Open is committed to open peer review. As part of this commitment we make the peer review history of every article we publish publicly available.

When an article is published we post the peer reviewers' comments and the authors' responses online. We also post the versions of the paper that were used during peer review. These are the versions that the peer review comments apply to.

The versions of the paper that follow are the versions that were submitted during the peer review process. They are not the versions of record or the final published versions. They should not be cited or distributed as the published version of this manuscript.

BMJ Open is an open access journal and the full, final, typeset and author-corrected version of record of the manuscript is available on our site with no access controls, subscription charges or pay-per-view fees (<http://bmjopen.bmj.com>).

If you have any questions on BMJ Open's open peer review process please email [info.bmjopen@bmj.com](mailto:info.bmjopen@bmj.com)

# BMJ Open

**Myalgic encephalomyelitis/ chronic fatigue syndrome:  
Impact on quality of life of partners and family members  
A prospective multinational, subject-initiated, cross  
sectional survey**

|                               |                                                                                                                                                                                                                                                                                                                                        |
|-------------------------------|----------------------------------------------------------------------------------------------------------------------------------------------------------------------------------------------------------------------------------------------------------------------------------------------------------------------------------------|
| Journal:                      | <i>BMJ Open</i>                                                                                                                                                                                                                                                                                                                        |
| Manuscript ID                 | bmjopen-2021-058128                                                                                                                                                                                                                                                                                                                    |
| Article Type:                 | Original research                                                                                                                                                                                                                                                                                                                      |
| Date Submitted by the Author: | 07-Oct-2021                                                                                                                                                                                                                                                                                                                            |
| Complete List of Authors:     | Vyas, Jui; Cardiff University, Centre for Medical Education<br>Muirhead, Nina ; Buckinghamshire Healthcare NHS Trust, Dermatology<br>Singh, Ravinder ; Cardiff University, Division of Infection and Immunity<br>Ephgrave, Rachel; Patient Research Partner<br>Finlay, Andrew ; Cardiff University, Division of Infection and Immunity |
| Keywords:                     | NEUROLOGY, SOCIAL MEDICINE, PUBLIC HEALTH                                                                                                                                                                                                                                                                                              |
|                               |                                                                                                                                                                                                                                                                                                                                        |

SCHOLARONE™  
Manuscripts

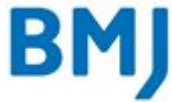

I, the Submitting Author has the right to grant and does grant on behalf of all authors of the Work (as defined in the below author licence), an exclusive licence and/or a non-exclusive licence for contributions from authors who are: i) UK Crown employees; ii) where BMJ has agreed a CC-BY licence shall apply, and/or iii) in accordance with the terms applicable for US Federal Government officers or employees acting as part of their official duties; on a worldwide, perpetual, irrevocable, royalty-free basis to BMJ Publishing Group Ltd ("BMJ") its licensees and where the relevant Journal is co-owned by BMJ to the co-owners of the Journal, to publish the Work in this journal and any other BMJ products and to exploit all rights, as set out in our [licence](#).

The Submitting Author accepts and understands that any supply made under these terms is made by BMJ to the Submitting Author unless you are acting as an employee on behalf of your employer or a postgraduate student of an affiliated institution which is paying any applicable article publishing charge ("APC") for Open Access articles. Where the Submitting Author wishes to make the Work available on an Open Access basis (and intends to pay the relevant APC), the terms of reuse of such Open Access shall be governed by a Creative Commons licence – details of these licences and which [Creative Commons](#) licence will apply to this Work are set out in our licence referred to above.

Other than as permitted in any relevant BMJ Author's Self Archiving Policies, I confirm this Work has not been accepted for publication elsewhere, is not being considered for publication elsewhere and does not duplicate material already published. I confirm all authors consent to publication of this Work and authorise the granting of this licence.

1  
2  
3 **Title Page**  
4

5 **Myalgic encephalomyelitis/ chronic fatigue syndrome: Impact on quality of life of partners**  
6 **and family members**

7 A prospective multinational, subject-initiated, cross sectional survey  
8  
9

10  
11  
12  
13 Jui Vyas (0000-0003-2839-2651), Nina L Muirhead (0000-0001-6620-1487), Ravinder K Singh  
14 (0000-0003-3112-8579), Rachel Ephgrave (0000-0002-0963-6369), Andrew Y Finlay (0000-  
15 0003-2143-1646)  
16

17  
18  
19  
20 Dr Jui Vyas  
21 Clinical Senior Lecturer  
22 Centre for Medical Education, School of Medicine, Cardiff University, Cardiff, CF14 4XN UK  
23

24  
25 Nina L Muirhead  
26 Dermatology Surgeon  
27 Buckinghamshire Healthcare NHS Trust, Amersham Hospital, Amersham HP7 0JD, UK  
28

29  
30 Ravinder K Singh  
31 Professional Specialist  
32 Division of Infection and Immunity, School of Medicine, Cardiff University, Cardiff, CF14  
33 4XN, UK  
34

35  
36 Rachel Ephgrave  
37 Patient research partner,  
38 Gloucestershire, UK  
39

40  
41 Andrew Y Finlay  
42 Professor of Dermatology  
43 Division of Infection and Immunity, School of Medicine, Cardiff University, Cardiff, CF14  
44 4XN, UK  
45

46  
47 Address for correspondence:  
48 Dr J Vyas  
49 Clinical Senior Lecturer  
50 Third floor, Glamorgan House  
51 School of Medicine, Cardiff University,  
52 Heath Park, Cardiff CF14 4XN  
53 [VyasJJ@cardiff.ac.uk](mailto:VyasJJ@cardiff.ac.uk)  
54

55  
56  
57 Word Count: 3309  
58  
59  
60

## ABSTRACT

**Objectives:** The aim of this study was to assess the impact of myalgic encephalomyelitis/chronic fatigue syndrome (ME/CFS) on the quality of life (QoL) of people with ME/CFS and their relative or partner (family member).

**Design:** A patient partner, prospective, multinational, subject initiated, cross sectional online survey.

**Setting:** International survey using ME/CFS charities, support groups and social media

**Participants:** Self-selected on social media. Inclusion criterion: aged 18 years or over, reported diagnosis of ME/CFS by health professional. 1418 people with ME/CFS and their 1418 family members from 30 countries. Participants with ME/CFS: mean age= 46 years (range 18-81), female=1214 (86% of 1418). Family members mean age =51.9 years (range 18-87), female=504 (36% of 1418). 991 (70% of 1418) family members were partners of the people with ME/CFS.

**Interventions:** EuroQoL 5 Dimension (EQ-5D-3L) completed by people with ME/CFS, and Family Reported Outcome Measure (FROM-16) questionnaire completed by family members.

**Results:** The mean overall health status on a visual analogue scale for people with ME/CFS was 33.8 (0=worst, 100=best). People with ME/CFS were most affected by ability to perform usual activities, pain, mobility, self-care and least impacted by anxiety. For family members the overall mean FROM-16 score was 17.9 (0=no impact to 32=worst impact) demonstrating a major impact on QoL. Impact on QoL was significantly correlated between the person with ME/CFS and their family member ( $p<0.0001$ ). Family members were most impacted emotionally by worry, frustration and sadness and personally by family activities, holidays, sex life and finances.

**Conclusions:** To the best of our knowledge, this is the largest study on the impact of the QoL of persons with ME/CFS and their family members. This research has revealed the significant worldwide burden of ME/CFS on the QoL of people with ME/CFS and on their family members' QoL and has implications for policy and practice.

## ARTICLE SUMMARY

### Strengths and Limitations of this study

#### Strengths

- Patient and public involvement in the design of the study
- International study with large number of participants
- Validated Quality of Life questionnaires for persons with ME/CFS and their family members

#### Limitations

- Recruitment bias towards English speaking participants
- Data on ethnicity was not collected

## INTRODUCTION

Myalgic encephalomyelitis/chronic fatigue syndrome (ME/CFS) is a chronic, complex, debilitating disease, with a negative impact on health-related quality of life (QoL) <sup>1</sup>, worse than for many other diseases <sup>2</sup>. There is growing international acknowledgement of the impact of ME/CFS on caregivers <sup>3</sup>: a pilot study, using the Family Reported Outcome Measure (FROM-16), showed that QoL of partners and other family members is greatly impaired, suggesting that ME/CFS impact goes far beyond the affected person <sup>4</sup>.

ME/CFS is characterised by multisystem symptoms exacerbated by mild exertion, pain, sleep disruption, orthostatic intolerance, cognitive dysfunction and severe and disabling fatigue not improved by rest <sup>5</sup>. ME/CFS occurs globally with a prevalence of up to 0.89% <sup>6</sup> though prevalence and impact are underestimated in many countries <sup>7</sup>. Often triggered by a virus, the COVID-19 pandemic may increase ME/CFS prevalence <sup>8</sup> and there needs to be improved international recognition of chronic post viral disease burden on QoL of sufferers and families.

This study's aim was to measure the impact of ME/CFS on the QoL of those affected and their partners or family members.

## METHODS

This was a prospective, multinational, subject-initiated, cross sectional survey to assess the impact of ME/CFS on the lives of patients and their partner or family member using the EuroQoL 5 Dimension (EQ-5D-3L)<sup>9</sup> and FROM-16 <sup>10</sup> questionnaires. Ethical permission was granted by Cardiff University School of Medicine ethics committee (11<sup>th</sup> September 2020).

REDCap, a secure web platform <sup>11 12</sup> was used for the survey, which was distributed via ME/CFS websites and social media platforms.

### Patient and Public Involvement

The study was co-designed by patients and clinical researchers. Patients with ME/CFS and their family members were involved at all stages of the study design and actively contributed to identifying the research questions and designing the research. Two of the authors, involved have ME/CFS: one is a clinician and the other a patient representative. Patient partners were directly involved in developing the ethics application and disseminating the surveys via patient charities and online. Burden of intervention and time required to participate in the survey was also assessed.

### Questionnaires used

#### EQ-5D-3L

This is a generic instrument measuring an individual's health status<sup>9 13</sup>. It has five dimensions (questions) on mobility, usual activities, self-care, pain and discomfort, and anxiety and depression. Three dimensions have three possible responses: no problems,

1  
2  
3 some problems, and inability. The responses for the other two dimensions are: no  
4 problems, moderate problems and extreme problems. Each response is coded from 1-3 and  
5 combined as a series of five digits describing the 'EQ-5D self-reported health state' or 'EQ-  
6 5D profile'<sup>14</sup>. The EQ-5D-3L has 234 possible health states. EQ-5D profiles can be converted  
7 to a single number, the 'EQ-5D value', "1" represents full health and "0" dead<sup>15</sup>. Values <0  
8 indicate a health state worse than death. Overall health status is recorded on a visual  
9 analogue scale, from 0 (worst imaginable health) to 100 (best imaginable health).  
10  
11

### 12 FROM-16

13 This questionnaire measures current QoL impact on a healthy person having a partner or  
14 family member with a health condition<sup>10</sup>. It can be completed by anyone over the age of 18  
15 years, concerning the impact of the health condition of a patient of any age. There are 16  
16 questions covering the domains "Emotional" (six questions) and "Personal and social life"  
17 (ten questions). Each question is scored from 0-2 (0=not at all, 1=a little, 2=a lot), with a  
18 score range of 0-32, "0" meaning no impact and "32" meaning greatest possible impact.  
19  
20  
21

### 22 Study Design

23 Multiple survey versions were piloted in November 2020, refining wording for clarity, ease  
24 of use and to identify and resolve technical issues. Feedback confirmed that the  
25 questionnaires were easy to answer and most persons with ME/CFS completed the EQ-5D  
26 questionnaire within five minutes. The preferred order of questionnaires was identified,  
27 with the questionnaire for the person with ME/CFS presented first followed by the family  
28 member/partner questionnaire, with the option to return later. Following participant  
29 comments, a few minor changes were made, for instance to obviate any confusion resulting  
30 from having more than one family member with ME/CFS.  
31  
32  
33

34 Informed consent was obtained via a tick box question for the participant with ME/CFS.  
35 Participants completed basic demographic questions including if they had a diagnosis of  
36 ME/CFS from a healthcare professional. To ascertain how many met ME/CFS criteria,  
37 participants were asked to select their symptoms from a tick box list adapted from the  
38 systemic exertion intolerance disease (SEID) US Institute of Medicine criteria for ME/CFS<sup>16</sup>, a  
39 clinical diagnostic tool comprising five ME/CFS symptoms. The criteria include technical  
40 language, hence a plain English version was devised specifically for this study. ME/CFS is  
41 diagnosed if all first three symptoms and at least one of the last two are present.  
42  
43  
44  
45  
46

47 Participants answered the EQ-5D-3L and then chose either their partner or another family  
48 member to complete the survey second part. The family member/partner could participate  
49 in the study immediately, or was invited via email link by the person with ME/CFS. Similar  
50 to the person with ME/CFS, a link to the participant information was provided and consent  
51 was given via a tick box question. Family members/partners then completed basic  
52 demographic data questions and the FROM-16. All participants were required to be aged 18  
53 years or over  
54  
55

### 56 Statistical analysis

Only data from participants with ME/CFS who had a formal diagnosis by a health care professional (HCP) and their family members were included in the final analysis. Duplicate entries were identified by email address and matching demographics: only the second was analysed. Microsoft Excel, SPSS and GraphPad Prism v9 were used for data handling and statistical analysis, involving descriptive statistics and parametric statistical tests including Item-total correlations, inter-item correlations and Spearman rank correlation coefficient.

## RESULTS

The survey was carried out from 1 December 2020 to 31 March 2021. It was started 2980 times. One participant withdrew consent, therefore 2979 records were generated. 2668 participants completed the first part of the survey, including the EQ-5D-3L. 1479 family members/partners completed the second part of the survey. Only the 1479 records that were fully completed by both patient and family members/partners were analysed further. 25 records were excluded either because they were duplicates (n=22) or for other reasons (n=3). From the remaining 1454 records a further 36 were excluded for not having a formal diagnosis of ME/CFS from a health care professional. The final analysis included 1418 survey responses representing 2836 participants (persons with ME/CFS and their family member/partner) (Figure 1).

### Demographic Profile of participants

Table 1 shows the participant demographics. Persons with ME/CFS and their family members worldwide participated in the study however most responses came from the UK (58.8%) and other English-speaking countries, including the USA (11.2%), Canada (5%) and Australia (5.8%) (Table 2). The average time since diagnosis of ME/CFS was 13.9 years, (median 11) with 15 patients diagnosed for 1 year and 8 for >50 years. However, 42 participants with ME/CFS and 1 family member did not answer this question. One family member entered an erroneous number.

|                      | Person with ME/CFS | Family Member |
|----------------------|--------------------|---------------|
| Number               | 1418               | 1418          |
| Time since diagnosis | 13.9 years         | n/a           |
| Age                  | 45.82 (18-81)      | 51.9 (18-87)  |
| Female               | 1214 (85.6%)       | 504 (35.5%)   |
| Male                 | 196 (13.8%)        | 902 (63.6%)   |



|                                                            |             |             |
|------------------------------------------------------------|-------------|-------------|
| Other                                                      | 8 (<1%)     | 12 (<1%)    |
| Separate Household                                         |             | 149 (10.5%) |
| Lives alone                                                | 158 (11.1%) |             |
| <b>Relationship of person with ME/CFS to family member</b> |             |             |
| Partner/Spouse                                             |             | 991 (69.9%) |
| Parent                                                     |             | 76 (5.35%)  |
| Sibling                                                    |             | 288 (20.3%) |
| Child                                                      |             | 28 (1.9%)   |
| Other                                                      |             | 35 (2.5%)   |
| >1 Family member has ME/CFS                                |             | 160 (11%)   |
| Family member has ME/CFS                                   |             | 49 (3%)     |

Table 1: Participant demographics

| Patient Country          | Number |
|--------------------------|--------|
| United Kingdom           | 834    |
| United States of America | 159    |
| Australia                | 82     |
| Canada                   | 71     |
| Norway                   | 40     |
| Germany                  | 34     |
| Netherlands              | 32     |

---

|    |                     |    |
|----|---------------------|----|
| 1  |                     |    |
| 2  |                     |    |
| 3  |                     |    |
| 4  | Sweden              | 31 |
| 5  |                     |    |
| 6  | Ireland             | 24 |
| 7  |                     |    |
| 8  |                     |    |
| 9  | New Zealand         | 24 |
| 10 |                     |    |
| 11 | Belgium             | 14 |
| 12 |                     |    |
| 13 |                     |    |
| 14 | Italy               | 10 |
| 15 |                     |    |
| 16 | Spain               | 10 |
| 17 |                     |    |
| 18 |                     |    |
| 19 | Japan               | 9  |
| 20 |                     |    |
| 21 |                     |    |
| 22 | Denmark             | 8  |
| 23 |                     |    |
| 24 | France              | 6  |
| 25 |                     |    |
| 26 |                     |    |
| 27 | South Africa        | 6  |
| 28 |                     |    |
| 29 | Finland             | 5  |
| 30 |                     |    |
| 31 |                     |    |
| 32 | Switzerland         | 5  |
| 33 |                     |    |
| 34 | Austria             | 3  |
| 35 |                     |    |
| 36 |                     |    |
| 37 | Portugal            | 2  |
| 38 |                     |    |
| 39 | China               | 1  |
| 40 |                     |    |
| 41 |                     |    |
| 42 | Croatia             | 1  |
| 43 |                     |    |
| 44 | Czech Republic      | 1  |
| 45 |                     |    |
| 46 |                     |    |
| 47 | Ghana               | 1  |
| 48 |                     |    |
| 49 | Iceland             | 1  |
| 50 |                     |    |
| 51 |                     |    |
| 52 | Poland              | 1  |
| 53 |                     |    |
| 54 | Senegal             | 1  |
| 55 |                     |    |
| 56 |                     |    |
| 57 | Trinidad and Tobago | 1  |
| 58 |                     |    |
| 59 |                     |    |
| 60 |                     |    |

---

|         |   |
|---------|---|
| Uruguay | 1 |
|---------|---|

Table 2: Person with ME/CFS country of residence

Reflecting the female preponderance for ME/CFS, far more females responded (85.6%) than male, eight did not answer this question. Only 11.1% (n=158) of participants with ME/CFS lived alone. Those that lived with others mainly shared with a life partner or family member, with only 14 people stating they lived with people outside that description. Most family members who participated lived with the person with ME/CFS, with only 149 living in a separate household and one unknown.

160 family members reported having more than one family member with ME/CFS and 49 family members were themselves ME/CFS sufferers. Two persons failed to answer this question.

All persons with ME/CFS completed five questions based on SEID criteria (Table 3). Most respondents, already diagnosed by a HCP, also met these diagnostic criteria. However, 93 respondents lacked the symptoms for the SEID ME/CFS diagnosis criteria but stated they had a medical diagnosis, and therefore were included in the analysis. 80 participants did not have one or more of the three required symptoms for diagnosis, including less able to do normal things (n=14), symptoms worse after physical, mental or emotional activity (n=12), sleep unrefreshing or disturbed (n=54). 12 stated they did not have two of the three criteria, with one stating they experienced none of the five criteria. Of the 36 (2.5%) people without an ME/CFS medical diagnosis not included in the data analysis, most reported ME/CFS diagnosis criteria symptoms. 604 (42.6%) of the ME/CFS participants reported having another chronic health condition.

| Symptom                                            | Yes          | No        |
|----------------------------------------------------|--------------|-----------|
| Less able to do normal things                      | 1404 (99%)   | 14 (1%)   |
| Worse after physical, mental or emotional activity | 1406 (99%)   | 12 (1%)   |
| Sleep unrefreshing/disturbed                       | 1364 (96.2%) | 54 (3.8%) |
| Brain fog                                          | 1382 (97.5%) | 36 (2.5%) |

Worse symptoms/dizziness when upright 1103 (77.8%) 315 (22.2%)

Table 3: Person with ME/CFS and the SEID criteria

### EQ-5D health profile of persons with ME/CFS

Figure 2 gives the EQ-5D results. Strikingly 98.5% (n=1397) of participants had problems performing their usual activities. Over half (n=775) were unable to perform their usual activities at all. Pain was the next most affected dimension with 93.9% (n=1331) experiencing some (n=976) and extreme (n=355) pain and discomfort. Mobility was affected in 88.6% (n=1256), with participants experiencing some problems (n=1063) with walking or confined to bed (n=193). In terms of self-care, 67.3% (n=954) had some problems or were unable to wash or dress themselves. Anxiety and depression was the least affected dimension, as 40.6% (n=576) participants reported they were not anxious or depressed at all, whilst 59.4% were either moderately (n=678) or extremely (n=164) anxious or depressed. The average EQ-5D VAS score of ME/CFS patients was 33.7, (median 47.5, SD 17.5, range 0-94) (Figure 2b).

Of the possible 234 EQ-5D-3L profiles, participants with ME/CFS expressed 94 unique profiles. Only three participants had a profile 11111, indicating no problems in any dimension. Similarly, 12 participants had a profile 33333 indicating extreme problems in all dimensions. Ten profiles accounted for 56.5% of EQ-5D-3L profiles (Table 4). The profile 22321 was the most frequent (n=128) indicating some problems with mobility and self-care, inability to perform usual activities, moderate pain/discomfort and no anxiety/depression. 22222 and 22322 were found in equal measure (n=117) the only difference is that 22222 means moderate problems in all dimensions whereas 22322 indicates moderate problems in all dimensions and inability to perform usual activities.

|              | EQ-5D state | EQ-5D Value | Frequency | % Frequency |
|--------------|-------------|-------------|-----------|-------------|
| Least Severe | 21221       | 0.659       | 72        | 5.07        |
|              | 21222       | 0.596       | 86        | 6.06        |
|              | 22221       | 0.566       | 70        | 4.93        |
|              | 22222       | 0.503       | 117       | 8.25        |
|              | 21321       | 0.394       | 55        | 3.87        |
|              | 21322       | 0.331       | 42        | 2.96        |

|                    |       |       |     |      |
|--------------------|-------|-------|-----|------|
|                    | 22321 | 0.301 | 128 | 9.02 |
|                    | 22322 | 0.238 | 117 | 8.25 |
|                    | 22331 | 0.214 | 43  | 3.03 |
| <b>Most Severe</b> | 22332 | 0.151 | 77  | 5.43 |

*Table 4: The 10 most frequent EQ-5D health states of ME/CFS participants, sorted according to EQ-5D value severity*

The EQ-5D-3L profile can be converted into a single number or EQ-5D value allowing for comparison with the general population. Our results demonstrate strikingly lower EQ-5D values in each age group for persons with ME/CFS compared to the general UK population<sup>17</sup>. Similarly, persons with ME/CFS reported much higher percentages of 'problems' in each of the EQ-5D dimensions compared to the UK population norm (Figure 3).

#### **Quality of Life of family member/partner of person with ME/CFS**

The FROM-16 examined the effects of a person's ME/CFS on their family member's emotions and personal/social life. Family members, on average, scored 7.62 (max=12, median=8, SD=2.81) in the emotional domain and 10.31 (max=20, median=10, SD=4.9) in the personal and social life domain (Figure 4). The average overall FROM-16 score (Figure 5) was 17.93 out of a total of 32 (median=18 SD=6.95) demonstrating a major impact of ME/CFS on family members.

ME/CFS had a significant impact on family member's emotions. Of the 1418 respondents, 96.1% (n=1362) felt worried due to their family member's ME/CFS, making it the most affected emotion. Frustration and sadness with their family member's ME/CFS were also highly prevalent with 93% (n=1369) experiencing frustration and 92.9% (n=1317) experiencing sadness. 84.7% (n=1201) found caring for their family members difficult, 73.4% (n=1041) found it difficult to talk to someone about their thoughts and 70% (n=994) of respondents were a little or a lot angry because of their family member's ME/CFS.

In the personal and social domain, the greatest impact was in the area of family activities with 92% (n=1302) respondents reporting family activities affected. Similarly, 85.3% (n=1210) experienced problems with holidays. 72.2% (n=1025) stated their sex life was affected and 77.3% (n=1096) felt their finances were impacted in that their family expenses increased. 68.6% (n=973) of respondents found it hard to find time for themselves. Sleep, work or study, and family relationships were almost equally affected with 66.9% (n=948) reporting a negative impact on their sleep, 65.7% a negative impact on their work or study and 63.8% (n=904) found their family relationships with other family members were affected due to their family member's ME/CFS. Everyday travel and eating habits of family members were the least affected of all the areas, with 54.8% (n=777) indicating a problem with everyday travel and 51.8% (n=735) reporting an effect on their eating habits.

1  
2  
3 In order to determine the relationship between the person with ME/CFS and their family  
4 members quality of life, we used linear regression analysis. We found a significant negative  
5 correlation between the total FROM-16 score of family members and the patients VAS score  
6 ( $P<0.0001$ ,  $R=-0.3467$ ,  $R^2=0.1146$ ) (Figure 6). Furthermore, a similar negative correlation was  
7 calculated using the total FROM-16 score and the EQ-5D value of patients ( $P<0.0001$ ,  $R=-$   
8  $0.411$ ,  $R^2=0.1668$ ) (Figure 7), supporting the fact that family member quality of life is  
9 significantly impacted by a ME/CFS.  
10  
11  
12

## 13 14 DISCUSSION

15  
16 To the best of our knowledge this is the largest study on the impact on the QoL of persons  
17 with ME/CFS and their family members. Our study confirmed that ME/CFS has a  
18 considerable negative impact on QoL. The most common EQ-5D-3L profiles demonstrated  
19 that people with ME/CFS experience problems across all domains with similar severity: the  
20 problems are not confined or localised to one aspect. None of the ten most frequent  
21 profiles in our survey reported a level 3 “a lot” for anxiety. The average EQ VAS score in our  
22 study was 33.8 (SD=17.5, median=47.5). The higher the EQ VAS, the better the QoL. The  
23 mean EQ VAS for the representative UK population is 82.75. Our data demonstrate that the  
24 QoL of family members of persons with ME/CFS is more impaired than in other conditions.  
25 In our study, in the Emotional domain of FROM-16, worry was the most frequently impacted  
26 item (96.1%,  $n=1362$ ), frustration was experienced by 93% ( $n=1319$ ) and sadness by 92.9%  
27 ( $n=1317$ ).  
28  
29  
30  
31

32 The study strengths include the patient co-design, with patient involvement at the heart of  
33 the research team, wide international dissemination of the survey and the very large  
34 numbers of participants. There has been controversy over diagnostic criteria for ME/CFS.  
35 Participants whose data was included in the analysis were required to have a healthcare  
36 professional diagnosis of ME/CFS. Of these participants, 93.4% also fulfilled the SEID criteria  
37 for ME/CFS diagnosis. This diagnostic confirmation is a major study strength. Limitations  
38 include recruitment bias towards English speaking self-selected people active on social  
39 media. Those more severely affected may not have responded because of ME/CFS’s  
40 debilitating physical effects. Conversely, they may have been more motivated to take part.  
41 Online delivery precluded checking whether assistance was given completing forms or  
42 whether the family member or patient allowed others to see their responses. Lack of  
43 anonymity within the family may have influenced some responses. Data on ethnic  
44 background was not collected.  
45  
46  
47  
48  
49

50 In contrast to the high level of QoL impact revealed in our study, the EQ-5D-3L profiles from  
51 a survey in England<sup>17 18</sup> reported that 56.2% of the general public have an EQ-5D profile of  
52 11111, indicating no problems in any dimension. An EQ-5D profile can be converted into an  
53 EQ-5D value, with a value of 1 indicating the best possible health. The mean EQ-5D value for  
54 persons with ME/CFS in our study was 0.36 (SD=0.21). In comparison, the mean EQ-5D value  
55 for the UK representative sample is 0.86 (SD=0.23)<sup>19</sup>. Myers et al<sup>20</sup> in their ME/CFS study  
56 reported a mean EQ-5D value of 0.56 (SD=0.35), representing a QoL impact between the UK  
57 representative sample and our ME/CFS participants. Hvidberg et al<sup>2</sup> reported an EQ-5D  
58 mean value of 0.47 in Danish ME/CFS patients, much lower than the representative Danish  
59  
60

1  
2  
3 population mean of 0.85. Their study demonstrated that the EQ-5D value for ME/CFS was  
4 the lowest of 20 chronic conditions. Nacul et al<sup>21</sup>, using the SF-36 in a UK population also  
5 demonstrated that the QoL of people with ME/CFS was lower than 10 other chronic  
6 conditions. Our findings of greatly impaired QoL are consistent with these studies.  
7  
8 The EQ VAS score in our study was in contrast with a higher VAS score of 54.3 (SD=23.3) in  
9 the Meyers study<sup>20</sup>. This discrepancy may be explained by the higher proportion of patients  
10 from the UK in our study. Brenna et al<sup>22</sup> conducted a survey of persons with ME/CFS in Italy,  
11 Latvia and the UK. Latvian respondents (n=74) reported the least impaired QoL (VAS  
12 mean=57.3, SD=16.3), Italian respondents (n=84) had a mean VAS score of 34.6 (SD=20.8)  
13 and the UK respondents (n=440) had a mean score of 31.5 (SD=19.8). A Swedish study by  
14 Jonsjo et al<sup>23</sup> involving 106 patients with ME/CFS reported a mean EQ-5D value of 0.3  
15 (SD=0.33) and a mean VAS score of 29.8 SD=15.7).  
16  
17

18  
19 Most previous studies on the impact on family members of persons with ME/CFS have  
20 focused on children with ME/CFS<sup>24-26</sup> making comparisons difficult, however  
21 in a pilot study, Brittain et al<sup>4</sup> compared the impact of ME/CFS on UK patients and on family  
22 members, using WHOQoL-BRef and FROM-16. That study demonstrated that poor QoL of  
23 the person with ME/CFS is associated with a high impact on the QoL of family members.  
24 There was no significant difference (p = 0.07) between the mean family impact for the  
25 Brittain study (mean FROM-16 score = 19.9, n=42) compared with our current international  
26 study (mean score = 17.9, n=1418). Chantarasap et al<sup>27</sup> assessed the impact on the QoL of  
27 family members of 248 patients diagnosed with various different cancers including  
28 hematologic malignancies. The mean FROM-16 score was 11.75 (significantly lower than in  
29 our study P<0.0001) with the mean scores in the Emotional domain =4.1, and Personal and  
30 social life domain=7.1. The mean FROM-16 scores in our study indicate that family  
31 members of patients with ME/CFS have a much lower QoL. In a recent cross sectional  
32 international study<sup>28</sup> measuring the impact of COVID-19 on survivors and their partners or  
33 family members, the mean FROM-16 score at 15 (n=735) was also high, but significantly less  
34 impacted than in our study (p<0.0001). The mean symptom duration for post covid  
35 symptoms was 12.8 weeks, but it is clear that a subset of long COVID patients matching  
36 ME/CFS diagnostic criteria is now emerging and a repeat study of those who remain  
37 symptomatic after a year would be interesting.  
38  
39  
40  
41  
42  
43

44  
45 ME/CFS needs to be acknowledged as a serious disease, causing significant impact on health  
46 and quality of life, not only of the individual but also on their family. Education for  
47 healthcare practitioners must be updated to reflect this. It would be possible to screen for  
48 these impacts using EQ-5D or FROM-16 in routine clinics. The medical encounter can be  
49 vastly improved by acknowledging the impact on family members and providing practical  
50 advice and support to both people with ME/CFS and their family members.  
51

### 52 53 **Unanswered questions and future research**

54  
55 Not all people with ME/CFS have a family member or partner to complete the FROM-16.  
56 Several individuals wrote to the research team explaining their isolation, difficulty  
57 maintaining family relationships and/or lack of empathy of family members. Further  
58  
59  
60

1  
2  
3 research is needed to understand the wider impact of ME/CFS on families and on  
4 individuals.  
5

6  
7 FROM-16 score meaning descriptors have not yet been developed, therefore a logical  
8 arbitrary assumption has been made of the scale of severity as expressed by the FROM-16  
9 scores. Our large dataset may allow further work towards categorising family impact scores  
10 and increasing the international validity of FROM-16. A study of this scale provides direction  
11 for future qualitative and focus group research to identify why certain aspects of family QoL  
12 are impacted more than others and to identify and develop supportive interventions to  
13 make the greatest impact. FROM-16 could be used as an outcome measure to assess such  
14 novel interventions.  
15  
16

## 17 18 19 **CONCLUSIONS**

20  
21 This research has the potential to have a major and immediate impact on the standard of  
22 care and compassion we offer to our patients and families and has implications for policy  
23 and practice. The significant worldwide burden of ME/CFS on quality of life for patients and  
24 their family members should be a call to arms for biomedical research in this disease.  
25  
26

## 27 28 29 **Author Statement**

30 JV: Conception of study, study design, data analysis, writing, reviewing and final approval of  
31 manuscript

32 NM: Study design, data analysis, writing, reviewing and final approval of manuscript

33 RKS: Data analysis, writing, reviewing and final approval of manuscript

34 RE: Study design, writing, reviewing and final approval of manuscript

35  
36  
37  
38  
39  
40  
41  
42  
43  
44  
45  
46  
47  
48  
49  
50  
51  
52  
53  
54  
55  
56  
57  
58  
59  
60  
61  
62  
63  
64  
65  
66  
67  
68  
69  
70  
71  
72  
73  
74  
75  
76  
77  
78  
79  
80  
81  
82  
83  
84  
85  
86  
87  
88  
89  
90  
91  
92  
93  
94  
95  
96  
97  
98  
99  
100  
101  
102  
103  
104  
105  
106  
107  
108  
109  
110  
111  
112  
113  
114  
115  
116  
117  
118  
119  
120  
121  
122  
123  
124  
125  
126  
127  
128  
129  
130  
131  
132  
133  
134  
135  
136  
137  
138  
139  
140  
141  
142  
143  
144  
145  
146  
147  
148  
149  
150  
151  
152  
153  
154  
155  
156  
157  
158  
159  
160  
161  
162  
163  
164  
165  
166  
167  
168  
169  
170  
171  
172  
173  
174  
175  
176  
177  
178  
179  
180  
181  
182  
183  
184  
185  
186  
187  
188  
189  
190  
191  
192  
193  
194  
195  
196  
197  
198  
199  
200  
201  
202  
203  
204  
205  
206  
207  
208  
209  
210  
211  
212  
213  
214  
215  
216  
217  
218  
219  
220  
221  
222  
223  
224  
225  
226  
227  
228  
229  
230  
231  
232  
233  
234  
235  
236  
237  
238  
239  
240  
241  
242  
243  
244  
245  
246  
247  
248  
249  
250  
251  
252  
253  
254  
255  
256  
257  
258  
259  
260  
261  
262  
263  
264  
265  
266  
267  
268  
269  
270  
271  
272  
273  
274  
275  
276  
277  
278  
279  
280  
281  
282  
283  
284  
285  
286  
287  
288  
289  
290  
291  
292  
293  
294  
295  
296  
297  
298  
299  
300  
301  
302  
303  
304  
305  
306  
307  
308  
309  
310  
311  
312  
313  
314  
315  
316  
317  
318  
319  
320  
321  
322  
323  
324  
325  
326  
327  
328  
329  
330  
331  
332  
333  
334  
335  
336  
337  
338  
339  
340  
341  
342  
343  
344  
345  
346  
347  
348  
349  
350  
351  
352  
353  
354  
355  
356  
357  
358  
359  
360  
361  
362  
363  
364  
365  
366  
367  
368  
369  
370  
371  
372  
373  
374  
375  
376  
377  
378  
379  
380  
381  
382  
383  
384  
385  
386  
387  
388  
389  
390  
391  
392  
393  
394  
395  
396  
397  
398  
399  
400  
401  
402  
403  
404  
405  
406  
407  
408  
409  
410  
411  
412  
413  
414  
415  
416  
417  
418  
419  
420  
421  
422  
423  
424  
425  
426  
427  
428  
429  
430  
431  
432  
433  
434  
435  
436  
437  
438  
439  
440  
441  
442  
443  
444  
445  
446  
447  
448  
449  
450  
451  
452  
453  
454  
455  
456  
457  
458  
459  
460  
461  
462  
463  
464  
465  
466  
467  
468  
469  
470  
471  
472  
473  
474  
475  
476  
477  
478  
479  
480  
481  
482  
483  
484  
485  
486  
487  
488  
489  
490  
491  
492  
493  
494  
495  
496  
497  
498  
499  
500  
501  
502  
503  
504  
505  
506  
507  
508  
509  
510  
511  
512  
513  
514  
515  
516  
517  
518  
519  
520  
521  
522  
523  
524  
525  
526  
527  
528  
529  
530  
531  
532  
533  
534  
535  
536  
537  
538  
539  
540  
541  
542  
543  
544  
545  
546  
547  
548  
549  
550  
551  
552  
553  
554  
555  
556  
557  
558  
559  
560  
561  
562  
563  
564  
565  
566  
567  
568  
569  
570  
571  
572  
573  
574  
575  
576  
577  
578  
579  
580  
581  
582  
583  
584  
585  
586  
587  
588  
589  
590  
591  
592  
593  
594  
595  
596  
597  
598  
599  
600  
601  
602  
603  
604  
605  
606  
607  
608  
609  
610  
611  
612  
613  
614  
615  
616  
617  
618  
619  
620  
621  
622  
623  
624  
625  
626  
627  
628  
629  
630  
631  
632  
633  
634  
635  
636  
637  
638  
639  
640  
641  
642  
643  
644  
645  
646  
647  
648  
649  
650  
651  
652  
653  
654  
655  
656  
657  
658  
659  
660  
661  
662  
663  
664  
665  
666  
667  
668  
669  
670  
671  
672  
673  
674  
675  
676  
677  
678  
679  
680  
681  
682  
683  
684  
685  
686  
687  
688  
689  
690  
691  
692  
693  
694  
695  
696  
697  
698  
699  
700  
701  
702  
703  
704  
705  
706  
707  
708  
709  
710  
711  
712  
713  
714  
715  
716  
717  
718  
719  
720  
721  
722  
723  
724  
725  
726  
727  
728  
729  
730  
731  
732  
733  
734  
735  
736  
737  
738  
739  
740  
741  
742  
743  
744  
745  
746  
747  
748  
749  
750  
751  
752  
753  
754  
755  
756  
757  
758  
759  
760  
761  
762  
763  
764  
765  
766  
767  
768  
769  
770  
771  
772  
773  
774  
775  
776  
777  
778  
779  
780  
781  
782  
783  
784  
785  
786  
787  
788  
789  
790  
791  
792  
793  
794  
795  
796  
797  
798  
799  
800  
801  
802  
803  
804  
805  
806  
807  
808  
809  
810  
811  
812  
813  
814  
815  
816  
817  
818  
819  
820  
821  
822  
823  
824  
825  
826  
827  
828  
829  
830  
831  
832  
833  
834  
835  
836  
837  
838  
839  
840  
841  
842  
843  
844  
845  
846  
847  
848  
849  
850  
851  
852  
853  
854  
855  
856  
857  
858  
859  
860  
861  
862  
863  
864  
865  
866  
867  
868  
869  
870  
871  
872  
873  
874  
875  
876  
877  
878  
879  
880  
881  
882  
883  
884  
885  
886  
887  
888  
889  
890  
891  
892  
893  
894  
895  
896  
897  
898  
899  
900  
901  
902  
903  
904  
905  
906  
907  
908  
909  
910  
911  
912  
913  
914  
915  
916  
917  
918  
919  
920  
921  
922  
923  
924  
925  
926  
927  
928  
929  
930  
931  
932  
933  
934  
935  
936  
937  
938  
939  
940  
941  
942  
943  
944  
945  
946  
947  
948  
949  
950  
951  
952  
953  
954  
955  
956  
957  
958  
959  
960  
961  
962  
963  
964  
965  
966  
967  
968  
969  
970  
971  
972  
973  
974  
975  
976  
977  
978  
979  
980  
981  
982  
983  
984  
985  
986  
987  
988  
989  
990  
991  
992  
993  
994  
995  
996  
997  
998  
999  
1000

## 99 100 101 102 103 104 105 106 107 108 109 110 111 112 113 114 115 116 117 118 119 120 121 122 123 124 125 126 127 128 129 130 131 132 133 134 135 136 137 138 139 140 141 142 143 144 145 146 147 148 149 150 151 152 153 154 155 156 157 158 159 160 161 162 163 164 165 166 167 168 169 170 171 172 173 174 175 176 177 178 179 180 181 182 183 184 185 186 187 188 189 190 191 192 193 194 195 196 197 198 199 200 201 202 203 204 205 206 207 208 209 210 211 212 213 214 215 216 217 218 219 220 221 222 223 224 225 226 227 228 229 230 231 232 233 234 235 236 237 238 239 240 241 242 243 244 245 246 247 248 249 250 251 252 253 254 255 256 257 258 259 260 261 262 263 264 265 266 267 268 269 270 271 272 273 274 275 276 277 278 279 280 281 282 283 284 285 286 287 288 289 290 291 292 293 294 295 296 297 298 299 300 301 302 303 304 305 306 307 308 309 310 311 312 313 314 315 316 317 318 319 320 321 322 323 324 325 326 327 328 329 330 331 332 333 334 335 336 337 338 339 340 341 342 343 344 345 346 347 348 349 350 351 352 353 354 355 356 357 358 359 360 361 362 363 364 365 366 367 368 369 370 371 372 373 374 375 376 377 378 379 380 381 382 383 384 385 386 387 388 389 390 391 392 393 394 395 396 397 398 399 400 401 402 403 404 405 406 407 408 409 410 411 412 413 414 415 416 417 418 419 420 421 422 423 424 425 426 427 428 429 430 431 432 433 434 435 436 437 438 439 440 441 442 443 444 445 446 447 448 449 450 451 452 453 454 455 456 457 458 459 460 461 462 463 464 465 466 467 468 469 470 471 472 473 474 475 476 477 478 479 480 481 482 483 484 485 486 487 488 489 490 491 492 493 494 495 496 497 498 499 500 501 502 503 504 505 506 507 508 509 510 511 512 513 514 515 516 517 518 519 520 521 522 523 524 525 526 527 528 529 530 531 532 533 534 535 536 537 538 539 540 541 542 543 544 545 546 547 548 549 550 551 552 553 554 555 556 557 558 559 560 561 562 563 564 565 566 567 568 569 570 571 572 573 574 575 576 577 578 579 580 581 582 583 584 585 586 587 588 589 590 591 592 593 594 595 596 597 598 599 600 601 602 603 604 605 606 607 608 609 610 611 612 613 614 615 616 617 618 619 620 621 622 623 624 625 626 627 628 629 630 631 632 633 634 635 636 637 638 639 640 641 642 643 644 645 646 647 648 649 650 651 652 653 654 655 656 657 658 659 660 661 662 663 664 665 666 667 668 669 670 671 672 673 674 675 676 677 678 679 680 681 682 683 684 685 686 687 688 689 690 691 692 693 694 695 696 697 698 699 700 701 702 703 704 705 706 707 708 709 710 711 712 713 714 715 716 717 718 719 720 721 722 723 724 725 726 727 728 729 730 731 732 733 734 735 736 737 738 739 740 741 742 743 744 745 746 747 748 749 750 751 752 753 754 755 756 757 758 759 760 761 762 763 764 765 766 767 768 769 770 771 772 773 774 775 776 777 778 779 780 781 782 783 784 785 786 787 788 789 790 791 792 793 794 795 796 797 798 799 800 801 802 803 804 805 806 807 808 809 810 811 812 813 814 815 816 817 818 819 820 821 822 823 824 825 826 827 828 829 830 831 832 833 834 835 836 837 838 839 840 841 842 843 844 845 846 847 848 849 850 851 852 853 854 855 856 857 858 859 860 861 862 863 864 865 866 867 868 869 870 871 872 873 874 875 876 877 878 879 880 881 882 883 884 885 886 887 888 889 890 891 892 893 894 895 896 897 898 899 900 901 902 903 904 905 906 907 908 909 910 911 912 913 914 915 916 917 918 919 920 921 922 923 924 925 926 927 928 929 930 931 932 933 934 935 936 937 938 939 940 941 942 943 944 945 946 947 948 949 950 951 952 953 954 955 956 957 958 959 960 961 962 963 964 965 966 967 968 969 970 971 972 973 974 975 976 977 978 979 980 981 982 983 984 985 986 987 988 989 990 991 992 993 994 995 996 997 998 999 1000

41 We wish to thank that the many patients and family members/partners who contributed to  
42 this study. We would like to thank Action for M.E. and The M.E. Association who publicised  
43 the study in their patient magazines as well as online. We wish to thank patient support  
44 organisations approached, many of whom publicised the study, including Forward ME, ME  
45 Research UK, ReMEember, Tymes Trust, BRAME, WAMES, MESiG, MEAction, IcanCME,  
46 SolveME, DecodeME, Edmesh, CureME. Deutsche Gesellschaft für ME/CFS Associazione  
47 Italiana, Emerge Australia, EUROMENE, European ME Alliance, ME Foreningen, Association  
48 Française du Syndrome de Fatigue Chronique, ME félag Íslands, RME, Irish ME Trust, Hope 4  
49 ME & Fibro NI , Norges ME Forening, International Alliance for M.E., Solve CFS/ME, MECFS  
50 Foundation South Africa, ACAF, ME/CFS Friendship group in Gloucestershire, Irish ME/CFS  
51 Association, Leeds ME network, Lost Voices Stiftung, ME Trust, ME CFS phone support group  
52 ME/cvs Vereniging, ME/ CVS-Stichting Nederland, National CFIDS Foundation, New Jersey  
53 ME/CFS Association, Oxfordshire Myalgic Encephalomyelitis Group for Action, Pandora  
54 ReMEemberCFS, Steungroep ME en Arbeidsongeschiktheid, Sussex & Kent ME/CFS Society  
55 The Grace Charity for M.E., WISCONSIN MYALGIC ENCEPHALOMYELITIS / CHRONIC FATIGUE  
56 SYNDROME ASSOCIATION, Fibroamérica, MECFS South Australia, ME CFS and Lyme  
57  
58  
59  
60



1  
2  
3 Association of WA, Far North Coast MECFS Association, ME/CFS/FM Support Association  
4 QLD, ACT ME/Chronic Fatigue Syndrome, ME/CFS Australia, Japan ME Association  
5 Društvo za fibromialgijo, ACSFCM, ME/CFS Schweiz, The Rocky Mountain CFS/ME & FM  
6 Association. We wish to acknowledge MEpedia which was used as a resource to identify  
7 national and international ME/CFS organisations.  
8  
9

### 10 11 12 **Funding statement**

13  
14 This research received no specific grant from any funding agency in the public, commercial  
15 or not-for-profit sectors'  
16

### 17 18 **Competing Interest statement:**

19  
20 All authors have completed the Unified Competing Interest form (available on request from  
21 the corresponding author) and declare no support from any organisation for the submitted  
22 work: AYF is joint copyright owner of FROM-16. No royalties from been received for use of  
23 FROM-1 in this study. A member of AYF's family is deputy chair of the NICE ME/CFS  
24 guideline committee. Outside of this study JV has been on an Advisory board for Amgen and  
25 received honorarium from L'Oreal and has been sponsored by UCB Pharma Ltd for a  
26 Dermatology conference. NM is Director of Doctors with ME, Chair of CMRC education  
27 working group for ME/CFS research collaborative, Member of Forward ME, witness for NICE  
28 education, information and support ME, education working groups ICANCME (Canada) and  
29 the ME/CFS Centre for Solutions (USA). RE is a member of the Patient Advisory Group to the  
30 CMRC, a member of the ME/CFS Friendship group in Gloucestershire and is both a patient  
31 with ME/CFS and a family member of a patient with ME/CFS. RKS has nothing to declare.  
32  
33  
34  
35  
36

37 The corresponding author attests that all listed authors meet authorship criteria and that no  
38 others meeting the criteria have been omitted.  
39  
40

### 41 42 **Data Sharing:**

43 The authors agree to share data on reasonable request  
44  
45  
46  
47  
48  
49  
50  
51  
52  
53  
54  
55  
56  
57  
58  
59  
60

## References

1. Eaton-Fitch N, Johnston S, Zalewski P, et al. Health-related quality of life in patients with myalgic encephalomyelitis/chronic fatigue syndrome: an Australian cross-sectional study. *Quality of Life Research* 2020;29(6):1521-31.
2. Falk Hvidberg M, Brinth LS, Olesen AV, et al. The health-related quality of life for patients with myalgic encephalomyelitis/chronic fatigue syndrome (ME/CFS). *PloS one* 2015;10(7):e0132421.
3. Experiences of Living with Severe Chronic Fatigue Syndrome/Myalgic Encephalomyelitis. Healthcare; 2021. Multidisciplinary Digital Publishing Institute.
4. Brittain E, Muirhead N, Finlay AY, et al. Myalgic Encephalomyelitis/Chronic Fatigue Syndrome (ME/CFS): Major Impact on Lives of Both Patients and Family Members. *Medicina* 2021;57(1):43.
5. Toogood PL, Clau DJ, Phadke S, et al. Myalgic encephalomyelitis/chronic fatigue syndrome (ME/CFS): Where will the drugs come from? *Pharmacological Research* 2021:105465.
6. Lim E-J, Ahn Y-C, Jang E-S, et al. Systematic review and meta-analysis of the prevalence of chronic fatigue syndrome/myalgic encephalomyelitis (CFS/ME). *Journal of translational medicine* 2020;18(1):1-15.
7. Njoku MGC, Jason LA, Torres-Harding SR. The prevalence of chronic fatigue syndrome in Nigeria. *Journal of health psychology* 2007;12(3):461-74.
8. Friedman KJ, Murovska M, Pheby DF, et al. Our evolving understanding of ME/CFS. *Medicina* 2021;57(3):200.
9. Rabin R, Charro Fd. EQ-SD: a measure of health status from the EuroQol Group. *Annals of medicine* 2001;33(5):337-43.
10. Golics CJ, Basra MKA, Finlay AY, et al. The development and validation of the Family Reported Outcome Measure (FROM-16)© to assess the impact of disease on the partner or family member. *Quality of Life Research* 2014;23(1):317-26.
11. Harris PA, Taylor R, Minor BL, et al. The REDCap consortium: Building an international community of software platform partners. *Journal of biomedical informatics* 2019;95:103208.
12. Harris PA, Taylor R, Thielke R, et al. Research electronic data capture (REDCap)—a metadata-driven methodology and workflow process for providing translational research informatics support. *Journal of biomedical informatics* 2009;42(2):377-81.
13. Group TE. EuroQol-a new facility for the measurement of health-related quality of life. *Health policy* 1990;16(3):199-208.
14. Devlin N, Parkin D, Janssen B. Analysis of EQ-5D Profiles. Methods for Analysing and Reporting EQ-5D Data. Cham: Springer International Publishing 2020:23-49.
15. Devlin N, Parkin D, Janssen B. Analysis of EQ-5D Values. Methods for Analysing and Reporting EQ-5D Data. Cham: Springer International Publishing 2020:61-86.
16. CDC. SEID US Institute of Medicine criteria for ME/CFS, 2015. [Internet]. [Available from: <https://www.cdc.gov/me-cfs/healthcare-providers/diagnosis/iom-2015-diagnostic-criteria.html> accessed 7 June 2021.

17. Szende A, Janssen B, Cabases J. Self-reported population health: an international perspective based on EQ-5D. 2014
18. Feng Y, Devlin N, Herdman M. Assessing the health of the general population in England: how do the three- and five-level versions of EQ-5D compare? *Health and quality of life outcomes* 2015;13:171-71. doi: 10.1186/s12955-015-0356-8
19. Kind P, Hardman G, Macran S. UK population norms for EQ-5D, York Centr for Health Economics: University of York, 1999.
20. Myers C, Wilks D. Comparison of Euroqol EQ-5D and SF-36 in patients with chronic fatigue syndrome. *Quality of Life Research* 1999;8(1):9-16. doi: 10.1023/A:1026459027453
21. Nacul LC, Lacerda EM, Campion P, et al. The functional status and well being of people with myalgic encephalomyelitis/chronic fatigue syndrome and their carers. *BMC Public Health* 2011;11(1):402. doi: 10.1186/1471-2458-11-402
22. Brenna E, Araja D, Pheby DFH. Comparative Survey of People with ME/CFS in Italy, Latvia, and the UK: A Report on Behalf of the Socioeconomics Working Group of the European ME/CFS Research Network (EUROMENE). *Medicina* 2021;57(3):300.
23. Jonsjö MA, Wicksell RK, Holmström L, et al. Identifying symptom subgroups in patients with ME/CFS – relationships to functioning and quality of life. *Fatigue: Biomedicine, Health & Behavior* 2017;5(1):33-42. doi: 10.1080/21641846.2017.1287546
24. Velleman S, Collin SM, Beasant L, et al. Psychological wellbeing and quality-of-life among siblings of paediatric CFS/ME patients: a mixed-methods study. *Clinical child psychology and psychiatry* 2016;21(4):618-33.
25. Missen A, Hollingworth W, Eaton N, et al. The financial and psychological impacts on mothers of children with chronic fatigue syndrome (CFS/ME). *Child: care, health and development* 2012;38(4):505-12.
26. Rangel L, Garralda ME, Jeffs J, et al. Family health and characteristics in chronic fatigue syndrome, juvenile rheumatoid arthritis, and emotional disorders of childhood. *Journal of the American Academy of Child & Adolescent Psychiatry* 2005;44(2):150-58.
27. Chantarasap P, Johns NP, Pairojkul S, et al. Validation of the Thai version of the family reported outcome measure (FROM-16)© to assess the impact of disease on the partner or family members of patients with cancer. *Health and Quality of Life Outcomes* 2019;17(1):32. doi: 10.1186/s12955-019-1091-3
28. Shah R, Ali FM, Nixon SJ, et al. Measuring the impact of COVID-19 on the quality of life of the survivors, partners and family members: a cross-sectional international online survey. *BMJ open* 2021;11(5):e047680.

## List of Figures

Figure 1: Participant numbers

Figure 2: EQ-5D health profile

Figure 3: EQ-5D value of ME/CFS vs population norm

Figure 4: Emotional and Personal and Social domain FROM-16 score s

Figure 5: Overall FROM-16 score

1  
2  
3 Figure 6: Regression analysis of FROM-16 and VAS score

4 Figure 7: Regression analysis of FROM-16 and EQ-5D value

5  
6  
7 **FIGURE LEGENDS**

8  
9 Figure 1: A flow diagram demonstrating the basis for participant inclusion/exclusion from  
10 the analysis of the study. Following this protocol, 1418 ME/CFS patients and their  
11 corresponding family members were identified for analysis.

12  
13  
14 Figure 2: The EQ-5D health states of the person with ME/CFS. (A) Patients were asked about  
15 the following 5 dimensions, each representing a different aspect of health; Usual activities,  
16 pain/discomfort, mobility, self-care and anxiety/depression. Each dimension has 3 levels (1=  
17 no problem, 2= some problem, 3= extreme problem), with the patient indicating their  
18 health state by identifying the level representative of their individual condition. (B) A graph  
19 showing the range of patient answers as they were asked to rate their health on a visual  
20 analogue scale (VAS), with 0 representing worst imaginable health state and 100 best  
21 imaginable health state. The average VAS score of patients with ME/CFS was 33.7.

22  
23  
24 Figure 3: The EQ-5D results of ME/CFS patients compared to the UK population norm. (A)  
25 The average EQ-5D Value of varying age groups for ME/CFS participants of our study,  
26 compared to the UK population. (B) The percentage of ME/CFS participants who reported a  
27 problem (level 2 or 3) for each of the EQ-5D dimensions as compared to the UK population  
28 norm.

29  
30  
31 Figure 4: FROM-16 score range for the family members of ME/CFS participants in (A) the  
32 emotional domain (max score 12) and (B) the personal/social domain (max score 20), with  
33 higher scores indicating greater impact on the family members quality of life.

34  
35  
36 Figure 5: Total FROM-16 scores for the family members of ME/CFS participants. (A) Family  
37 members were asked about different aspects of their lives. Each question had 3 responses  
38 (0=not at all, 1= a little, 2= a lot). Responses have been sorted from the most impact on  
39 family member lives to the least, in both the emotional and personal domains. (B) The  
40 FROM-16 score range of family members, with 0 representing no impact on family member  
41 quality of life and 32 the greatest impact of patients ME/CFS on family members quality of  
42 life. The average score in this study was 17.93 out of a possible 32.

43  
44  
45 Figure 6: Correlation of total FROM-16 scores with the VAS health state of  
46 patients. (A) Scatter plot illustrating the relationship between total FROM-16 scores and  
47 patient EQ-5D VAS. The solid line represents the linear fit of data. Figure shows the P value,  
48 R and R<sup>2</sup> (B) Residual plot showing the simple linear regression of FROM-16 scores and EQ-  
49 5D VAS, as the points are randomly dispersed.

50  
51  
52 Figure 7: Correlation of total FROM-16 scores with the EQ-5D Values of patients. (A) Scatter  
53 plot illustrating the relationship between total FROM-16 scores and patient EQ-5D  
54 values. The solid line represents the linear fit of data. Figure shows the P value, R and R<sup>2</sup> (B)  
55 Residual plot showing the simple linear regression of FROM-16 scores and EQ-5D values, as  
56 the points are randomly dispersed.

1  
2  
3  
4  
5  
6  
7  
8  
9  
10  
11  
12  
13  
14  
15  
16  
17  
18  
19  
20  
21  
22  
23  
24  
25  
26  
27  
28  
29  
30  
31  
32  
33  
34  
35  
36  
37  
38  
39  
40  
41  
42  
43  
44  
45  
46  
47  
48  
49  
50  
51  
52  
53  
54  
55  
56  
57  
58  
59  
60

For peer review only

1  
2  
3  
4  
5  
6  
7  
8  
9  
10  
11  
12  
13  
14  
15  
16  
17  
18  
19  
20  
21  
22  
23  
24  
25  
26  
27  
28  
29  
30  
31  
32  
33  
34  
35  
36  
37  
38  
39  
40  
41

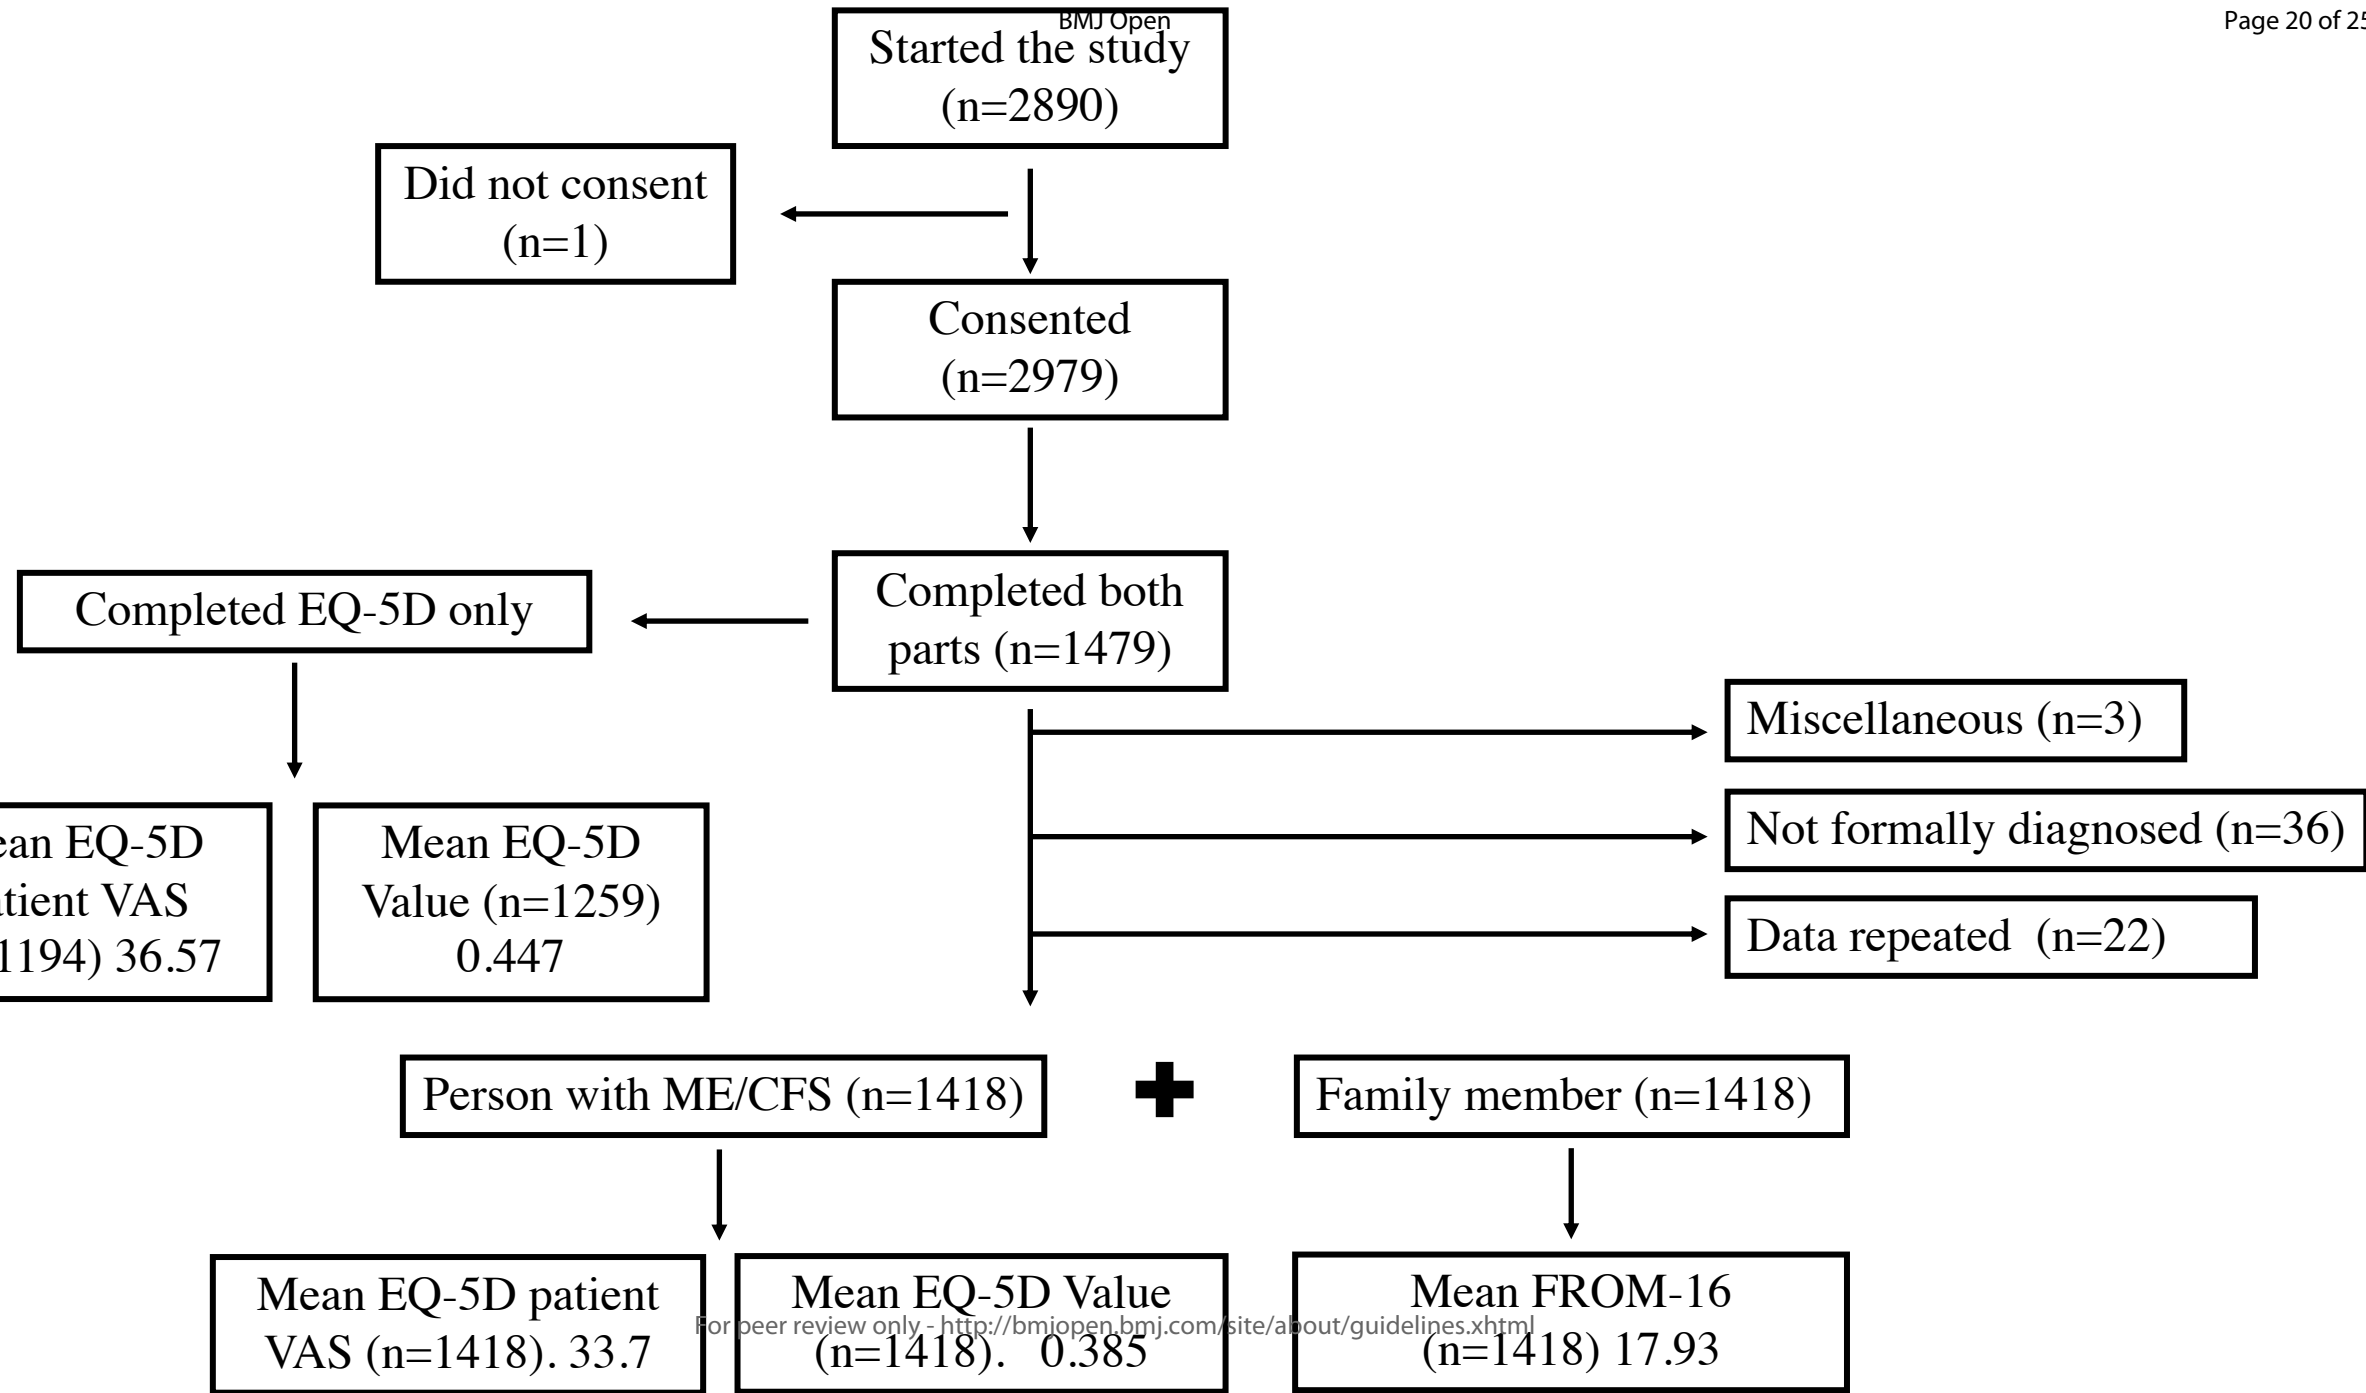

1  
2  
3  
4  
5  
6  
7  
8  
9  
10  
11  
12  
13  
14  
15  
16  
17  
18  
19  
20  
21  
22  
23  
24  
25  
26  
27  
28  
29  
30  
31  
32  
33  
34  
35  
36  
37  
38  
39  
40  
41

**A)**

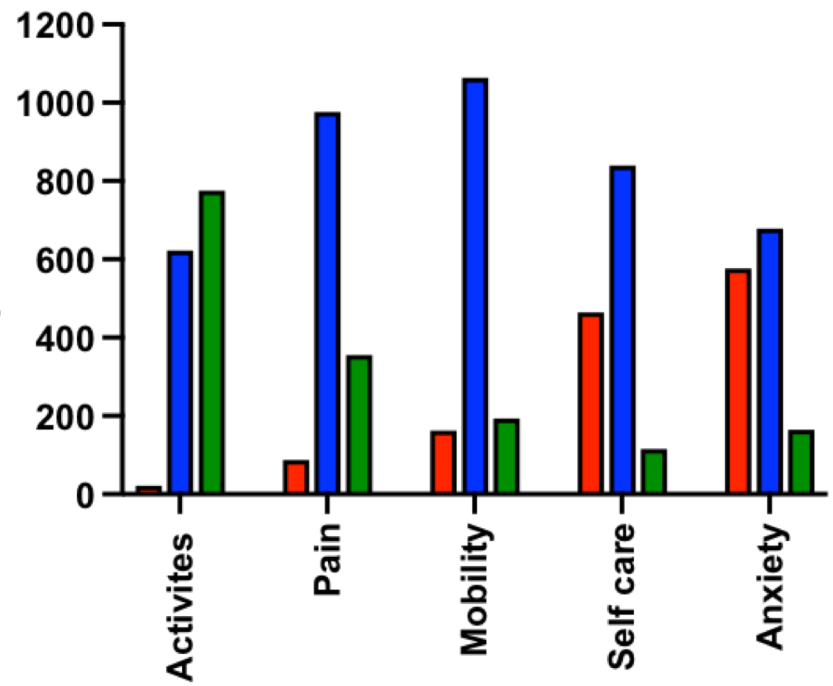

**B)**

1 (no problem)  
2 (some problem)  
3 (extreme problem)

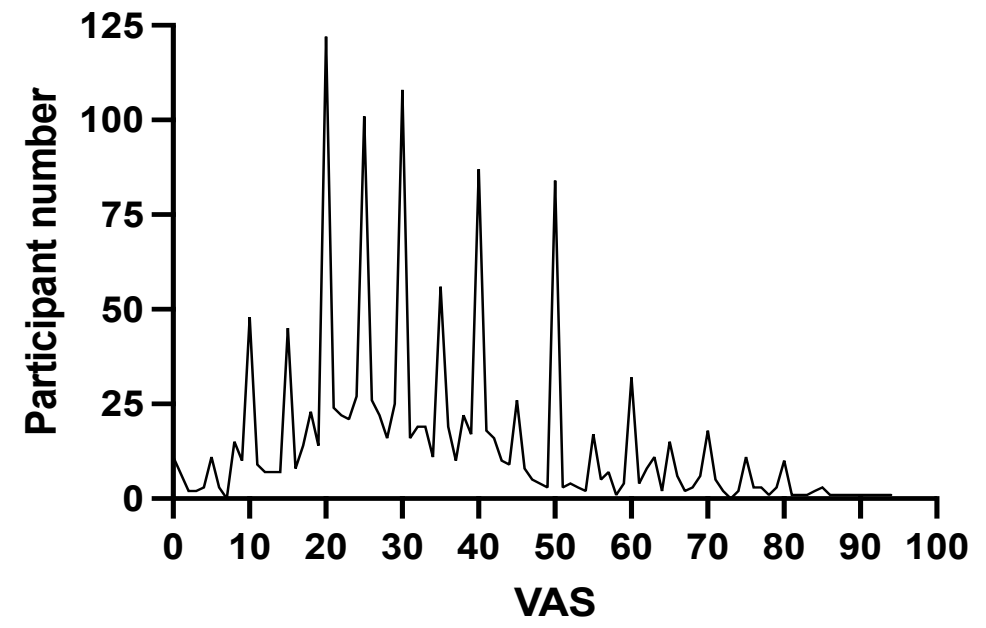

A)

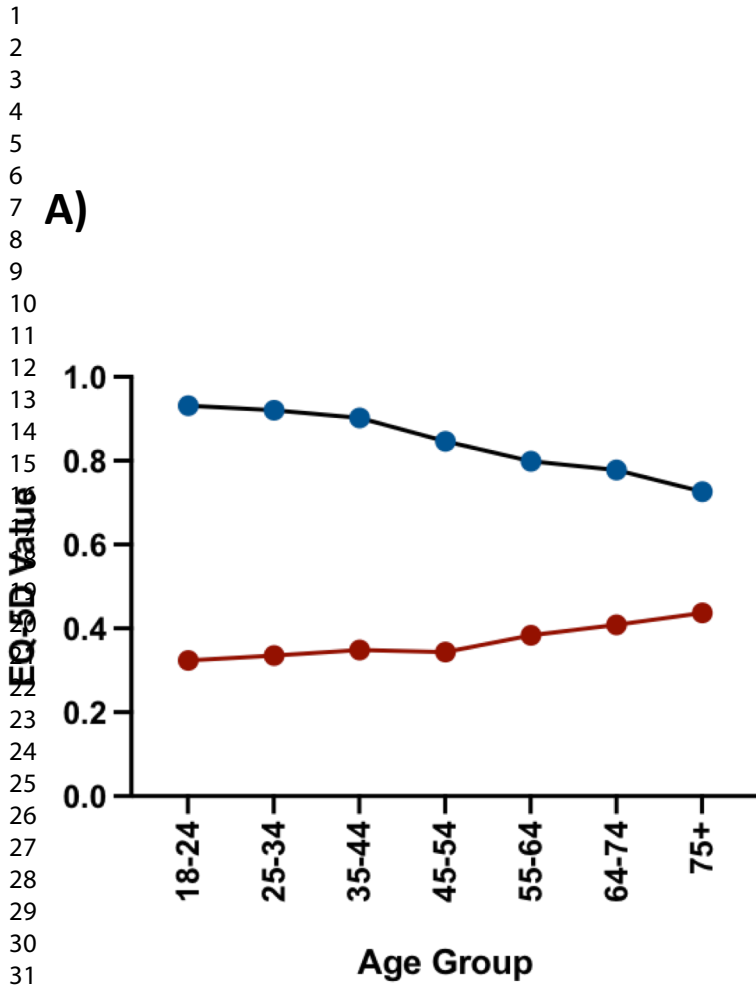

B)

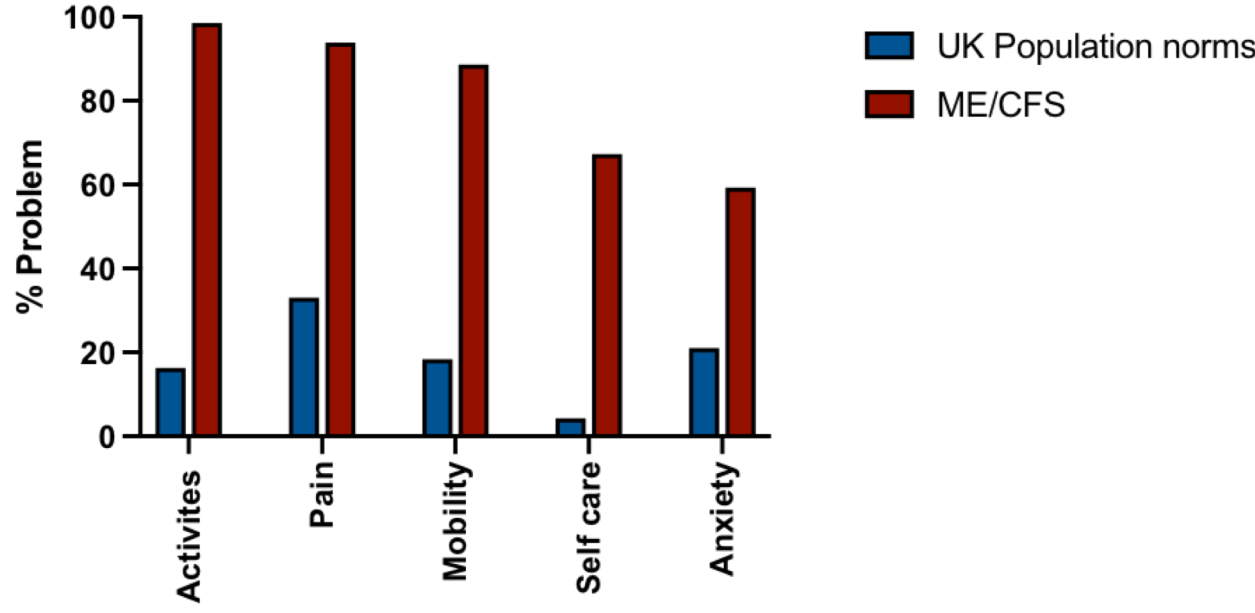



A)

**FROM-16 Emotional score**

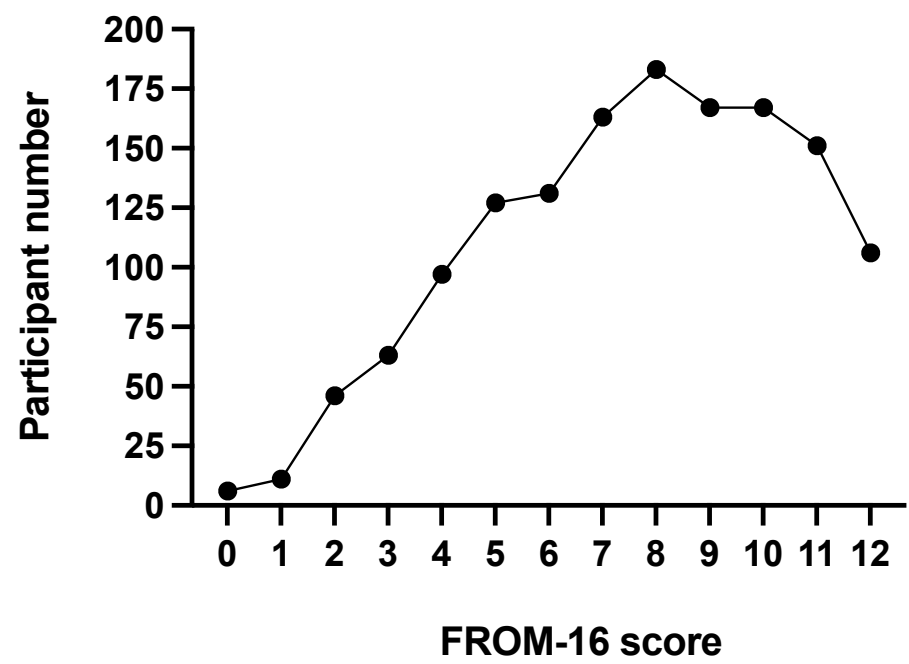

B)

**FROM-16 Personal score**

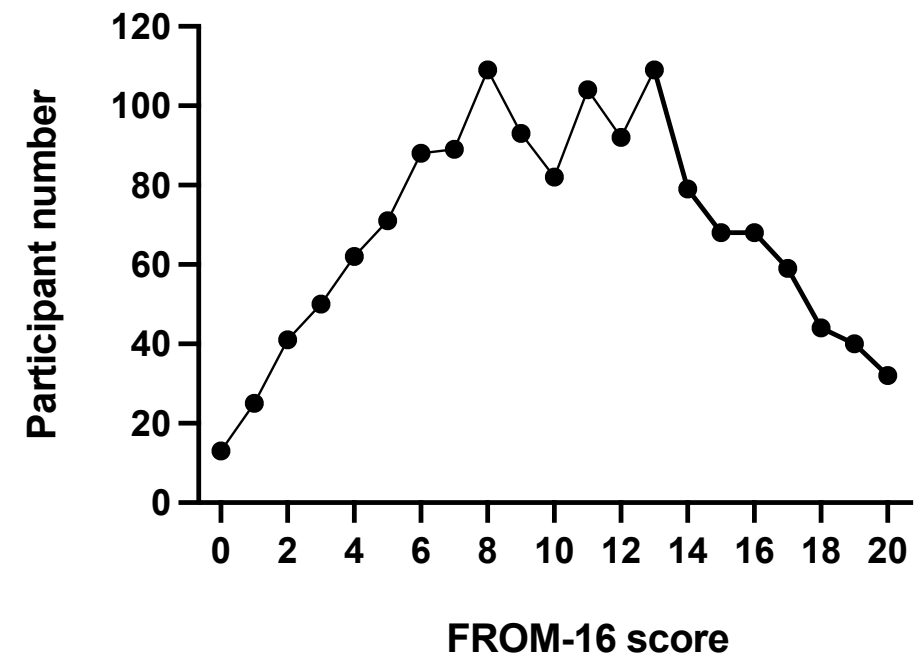

A)

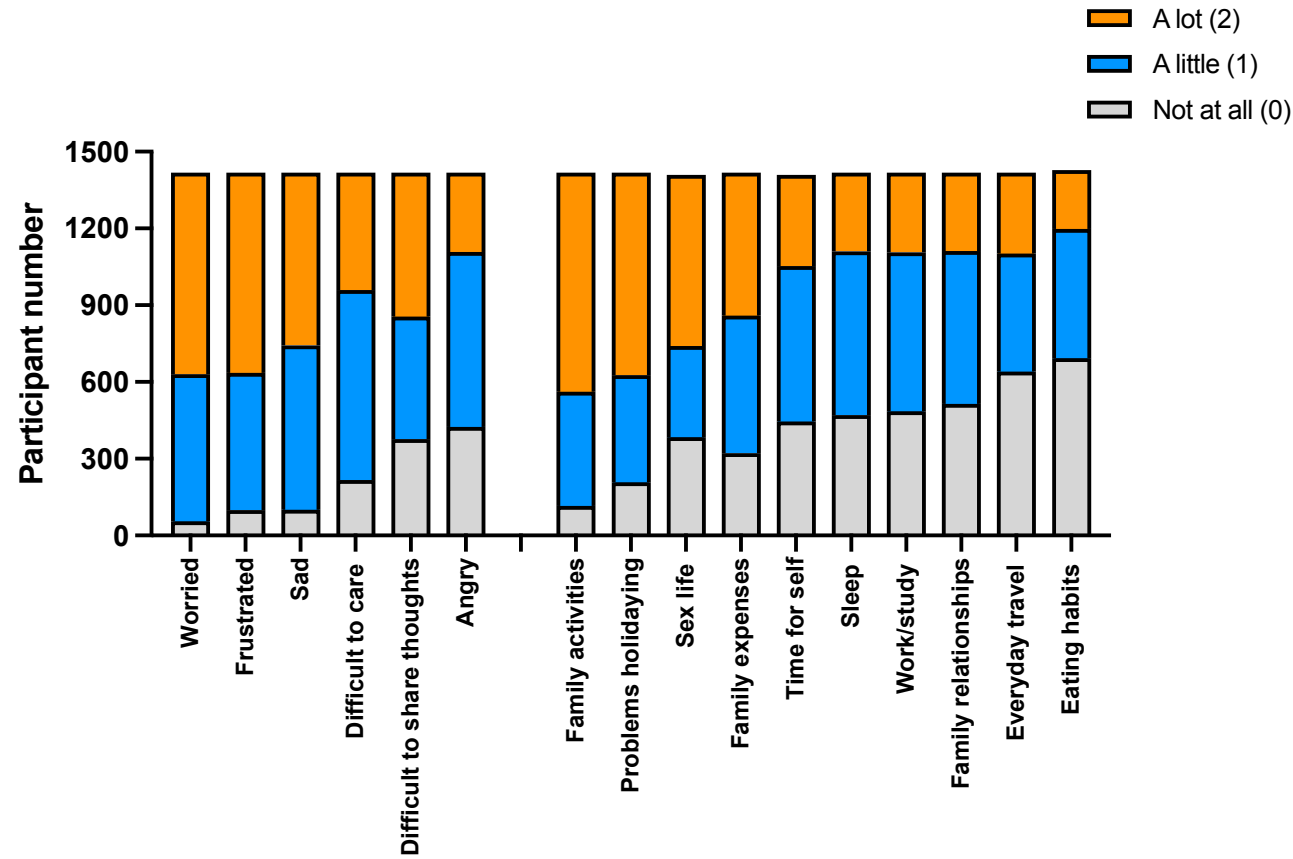

B)

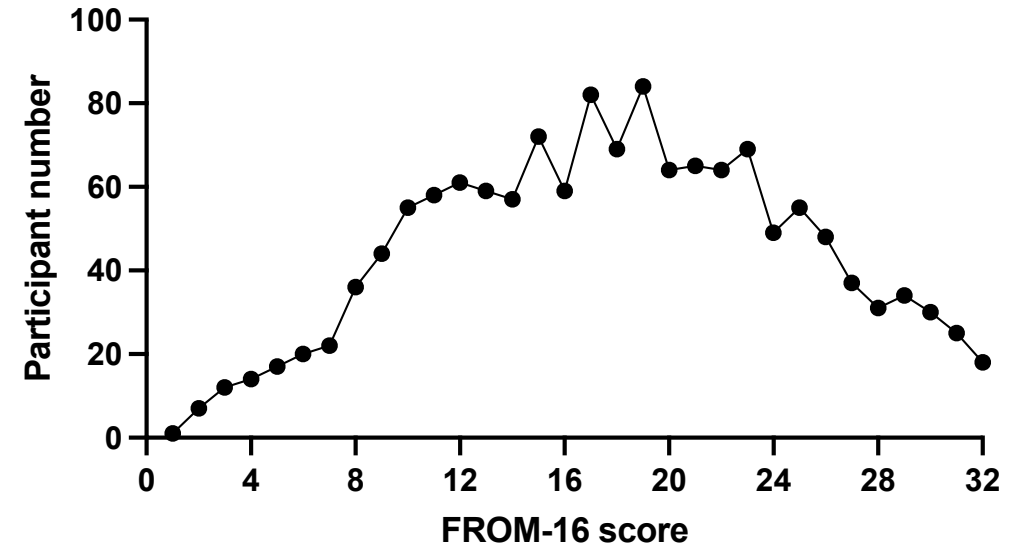

1  
2  
3  
4  
5  
6  
7  
8  
9  
10  
11  
12  
13  
14  
15  
16  
17  
18  
19  
20  
21  
22  
23  
24  
25  
26  
27  
28  
29  
30  
31  
32  
33  
34  
35  
36  
37  
38  
39  
40  
41

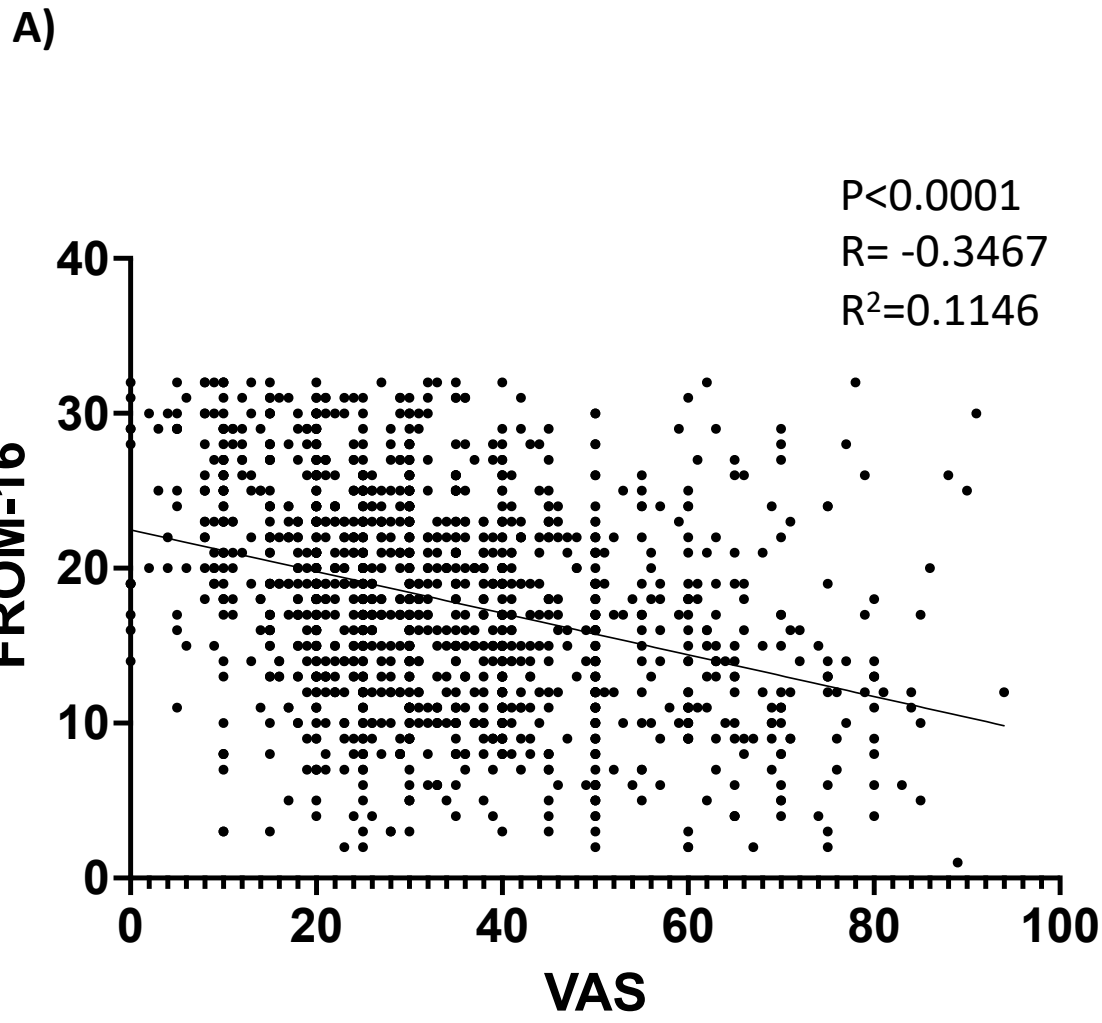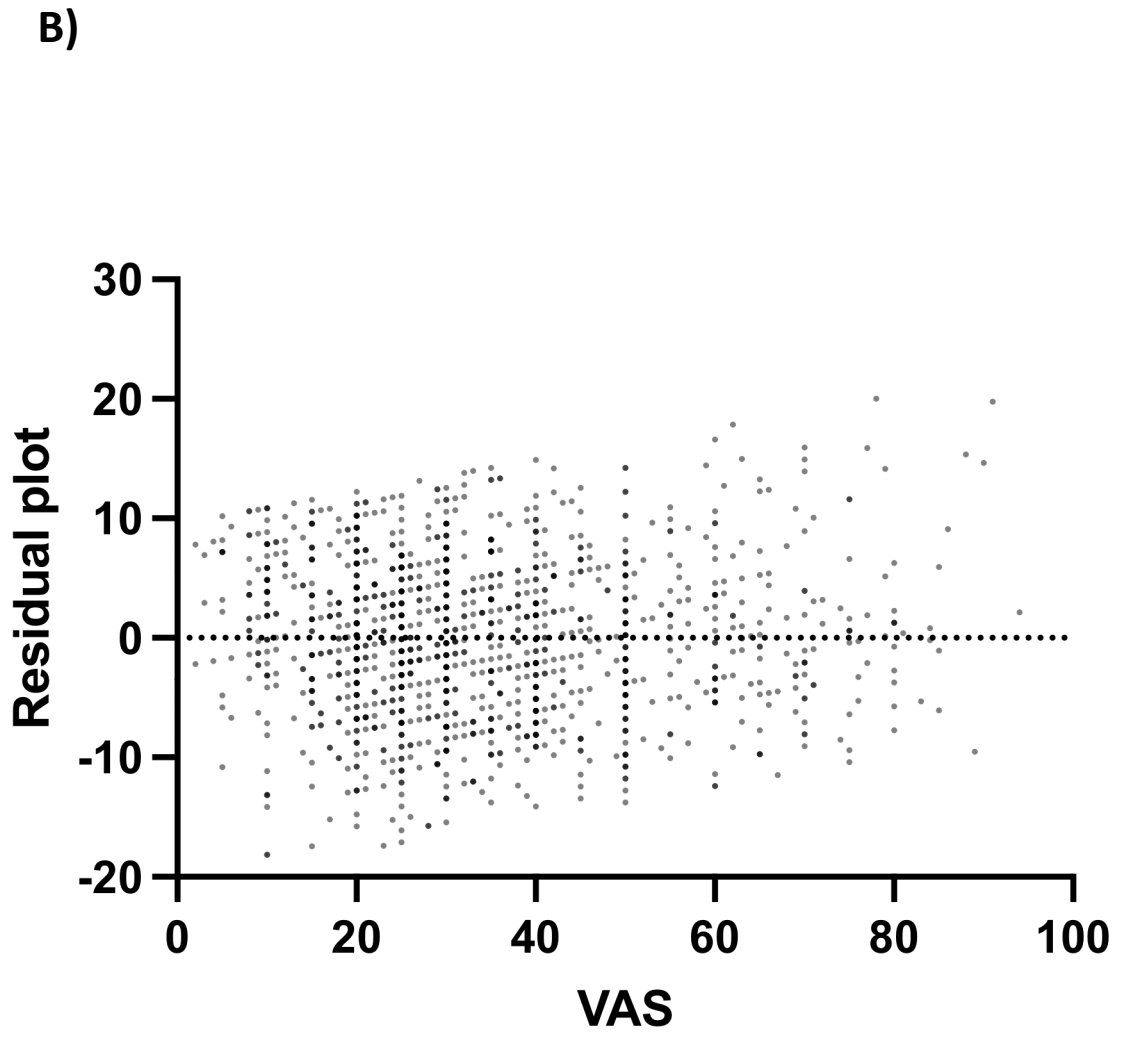

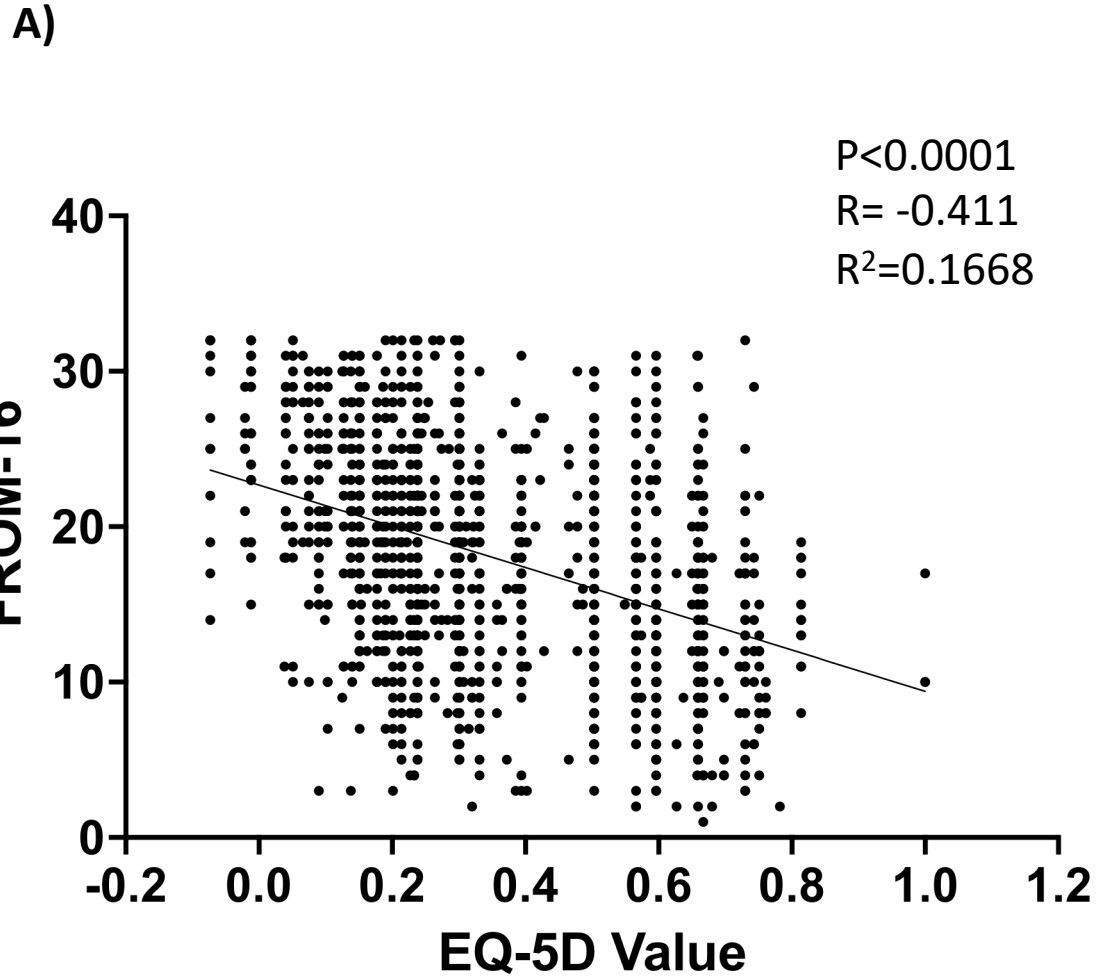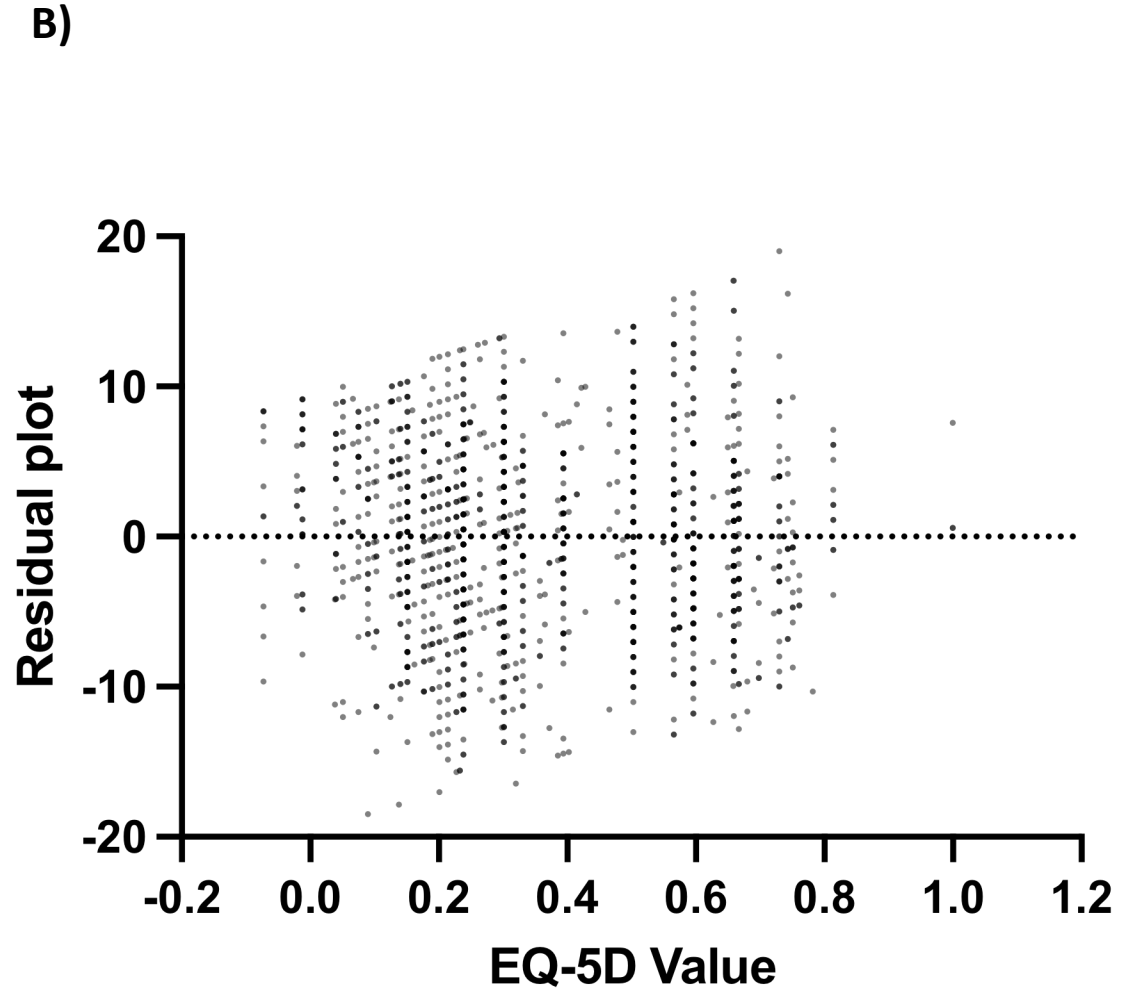

1  
2  
3  
4  
5  
6  
7  
8  
9  
10  
11  
12  
13  
14  
15  
16  
17  
18  
19  
20  
21  
22  
23  
24  
25  
26  
27  
28  
29  
30  
31  
32  
33  
34  
35  
36  
37  
38  
39  
40  
41

# BMJ Open

## Impact of myalgic encephalomyelitis/chronic fatigue syndrome (ME/CFS) on the quality of life of people with ME/CFS and their partners and family members: an online cross-sectional survey

|                                 |                                                                                                                                                                                                                                                                                                                                                                                        |
|---------------------------------|----------------------------------------------------------------------------------------------------------------------------------------------------------------------------------------------------------------------------------------------------------------------------------------------------------------------------------------------------------------------------------------|
| Journal:                        | <i>BMJ Open</i>                                                                                                                                                                                                                                                                                                                                                                        |
| Manuscript ID                   | bmjopen-2021-058128.R1                                                                                                                                                                                                                                                                                                                                                                 |
| Article Type:                   | Original research                                                                                                                                                                                                                                                                                                                                                                      |
| Date Submitted by the Author:   | 18-Mar-2022                                                                                                                                                                                                                                                                                                                                                                            |
| Complete List of Authors:       | Vyas, Jui; Cardiff University, Centre for Medical Education<br>Muirhead, Nina ; Buckinghamshire Healthcare NHS Trust, Dermatology<br>Singh, Ravinder ; Cardiff University, Division of Infection and Immunity<br>Ephgrave, Rachel; Patient Research Partner<br>Finlay, Andrew ; Cardiff University, Department of Dermatology and<br>Wound Healing, Division of Infection and Immunity |
| <b>Primary Subject Heading</b>: | Neurology                                                                                                                                                                                                                                                                                                                                                                              |
| Secondary Subject Heading:      | General practice / Family practice                                                                                                                                                                                                                                                                                                                                                     |
| Keywords:                       | NEUROLOGY, SOCIAL MEDICINE, PUBLIC HEALTH                                                                                                                                                                                                                                                                                                                                              |
|                                 |                                                                                                                                                                                                                                                                                                                                                                                        |

SCHOLARONE™  
Manuscripts

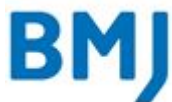

I, the Submitting Author has the right to grant and does grant on behalf of all authors of the Work (as defined in the below author licence), an exclusive licence and/or a non-exclusive licence for contributions from authors who are: i) UK Crown employees; ii) where BMJ has agreed a CC-BY licence shall apply, and/or iii) in accordance with the terms applicable for US Federal Government officers or employees acting as part of their official duties; on a worldwide, perpetual, irrevocable, royalty-free basis to BMJ Publishing Group Ltd ("BMJ") its licensees and where the relevant Journal is co-owned by BMJ to the co-owners of the Journal, to publish the Work in this journal and any other BMJ products and to exploit all rights, as set out in our [licence](#).

The Submitting Author accepts and understands that any supply made under these terms is made by BMJ to the Submitting Author unless you are acting as an employee on behalf of your employer or a postgraduate student of an affiliated institution which is paying any applicable article publishing charge ("APC") for Open Access articles. Where the Submitting Author wishes to make the Work available on an Open Access basis (and intends to pay the relevant APC), the terms of reuse of such Open Access shall be governed by a Creative Commons licence – details of these licences and which [Creative Commons](#) licence will apply to this Work are set out in our licence referred to above.

Other than as permitted in any relevant BMJ Author's Self Archiving Policies, I confirm this Work has not been accepted for publication elsewhere, is not being considered for publication elsewhere and does not duplicate material already published. I confirm all authors consent to publication of this Work and authorise the granting of this licence.

1  
2  
3 **Impact of myalgic encephalomyelitis/chronic fatigue syndrome (ME/CFS) on the quality of**  
4 **life of people with ME/CFS and their partners and family members: an online cross-**  
5 **sectional survey**  
6  
7

8 Jui Vyas (0000-0003-2839-2651), Nina L Muirhead (0000-0001-6620-1487), Ravinder K Singh  
9 (0000-0003-3112-8579), Rachel A Ephgrave (0000-0002-0963-6369), Andrew Y Finlay (0000-  
10 0003-2143-1646)  
11  
12  
13  
14  
15

16  
17 Jui Vyas  
18 Clinical Reader  
19 Centre for Medical Education, School of Medicine, Cardiff University, Cardiff, CF14 4XN, UK  
20

21  
22 Nina L Muirhead  
23 Dermatology Surgeon  
24 Buckinghamshire Healthcare NHS Trust, Amersham Hospital, Amersham HP7 0JD, UK  
25

26  
27 Ravinder K Singh  
28 Professional Specialist  
29 Division of Infection and Immunity, School of Medicine, Cardiff University, Cardiff, CF14  
30 4XN, UK  
31

32  
33 Rachel A Ephgrave  
34 Patient research partner,  
35 Gloucestershire, UK  
36

37  
38 Andrew Y Finlay  
39 Professor of Dermatology  
40 Division of Infection and Immunity, School of Medicine, Cardiff University, Cardiff, CF14  
41 4XN, UK  
42

43 Address for correspondence:  
44 Dr J Vyas  
45 Clinical Reader  
46 Third floor, Glamorgan House  
47 School of Medicine, Cardiff University,  
48 Heath Park, Cardiff CF14 4XN  
49 [VyasJJ@cardiff.ac.uk](mailto:VyasJJ@cardiff.ac.uk)  
50  
51

52  
53 Word Count: 3927  
54  
55  
56  
57  
58  
59  
60

## ABSTRACT

**Objectives:** The aim of this study was to assess the impact of myalgic encephalomyelitis/chronic fatigue syndrome (ME/CFS) on the quality of life (QoL) of people with ME/CFS and their relative or partner (family member).

**Design:** A patient-partner, multinational, subject-initiated, cross-sectional online survey.

**Setting:** International survey using ME/CFS charities, support groups and social media

**Participants:** Participants were self-selected with recruitment via social media. Inclusion criteria were aged 18 years or over and reported diagnosis of ME/CFS by health professional. 1418 people with ME/CFS and their 1418 family members from 30 countries participated in the survey. Participants with ME/CFS had a mean age of 46 years (range 18-81) and were predominantly female (1214 [86%] of 1418). Family members had a mean age of 51.9 years (range 18-87) and were predominantly male (female: 504 [36%] of 1418). 991 (70%) family members were partners of the people with ME/CFS.

**Interventions:** EuroQoL 5 Dimension (EQ-5D-3L), completed by people with ME/CFS, and Family Reported Outcome Measure (FROM-16) questionnaire, completed by family members.

**Results:** The mean overall health status on a visual analogue scale for people with ME/CFS was 33.8 (0=worst, 100=best). People with ME/CFS were most affected by ability to perform usual activities, pain, mobility, self-care and least impacted by anxiety. For family members, the overall mean FROM-16 score was 17.9 (0=no impact, 32=worst impact), demonstrating a major impact on QoL. Impact on QoL was significantly correlated between the person with ME/CFS and their family member ( $p<0.0001$ ). Family members were most impacted emotionally by worry, frustration and sadness and personally by family activities, holidays, sex life and finances.

**Conclusions:** To the best of our knowledge, this is the largest study on the impact of the QoL of persons with ME/CFS and their family members. Whilst open participation surveys are limited by selection bias, this research has revealed a significant worldwide burden of ME/CFS on the QoL of people with ME/CFS and their family members.

### Strengths and limitations of this study

- International study with patient and public involvement in the study design.
- Use of validated quality of life questionnaires for persons with ME/CFS and their family members.
- Patients were only included in the data analysis if they reported a healthcare professional diagnosis of ME/CFS.
- However, recruitment was biased towards English-speaking participants
- Open participation can lead to sampling bias, limiting the generalisability of these findings.

## INTRODUCTION

Myalgic encephalomyelitis/chronic fatigue syndrome (ME/CFS) is a chronic, complex, debilitating disease, with existing literature demonstrating a negative impact on health-



1  
2  
3 related quality of life (QoL) <sup>1</sup>, worse than for many other diseases <sup>2</sup>. There is growing  
4 international acknowledgement of the impact of ME/CFS on caregivers <sup>3</sup>, but there is only a  
5 small scale pilot study, using the Family Reported Outcome Measure (FROM-16) which  
6 showed that QoL of partners and other family members is greatly impaired, suggesting that  
7 ME/CFS impact goes far beyond the affected person <sup>4</sup>. There is therefore very little  
8 information about the partner/family impact, a gap in ME/CFS knowledge which this study  
9 aims to address.

10  
11 ME/CFS is characterised by multisystem symptoms exacerbated by mild exertion, pain, sleep  
12 disruption, orthostatic intolerance, cognitive dysfunction and severe and disabling fatigue  
13 not improved by rest <sup>5</sup>. ME/CFS occurs globally with a prevalence of up to 0.89% <sup>6</sup> though  
14 prevalence and impact are underestimated in many countries <sup>7</sup>. Often triggered by a virus,  
15 the COVID-19 pandemic may increase ME/CFS prevalence <sup>8</sup> and there needs to be improved  
16 international recognition of chronic post viral disease burden on QoL of sufferers and  
17 families.  
18  
19

20  
21 This study's aim was to measure the impact of ME/CFS on the QoL of those affected and  
22 expand knowledge by conducting a large-scale international study on the impact on QoL of  
23 their partners or family members. In addition we aimed to determine correlation of QoL  
24 data between the persons with ME/CFS and their family members.  
25  
26

## 27 **METHODS**

28  
29 This was a multinational, subject-initiated, cross-sectional survey to assess the impact of  
30 ME/CFS on the lives of patients and their partner or family member using the EuroQoL 5  
31 Dimension (EQ-5D-3L)<sup>9</sup> and FROM-16 <sup>10</sup> questionnaires. Ethical permission was granted by  
32 Cardiff University School of Medicine ethics committee (11<sup>th</sup> September 2020 SMREC  
33 20/86).  
34  
35

36  
37 REDCap, a secure web platform <sup>11 12</sup> was used for the survey, which was distributed via  
38 ME/CFS organisations, websites and social media platforms.  
39  
40

## 41 **Patient and public involvement**

42  
43 The study was co-designed by patients and clinical researchers. Patients with ME/CFS and  
44 their family members were involved at all stages of the study design and actively  
45 contributed to identifying the research questions and designing the research. Two of the  
46 authors, involved have ME/CFS: one is a clinician and the other a patient representative.  
47 Patient partners were directly involved in developing the ethics application and  
48 disseminating the surveys via patient charities and online. Burden of intervention and time  
49 required to participate in the survey was also assessed.  
50  
51

## 52 **Questionnaires**

### 53 **EQ-5D-3L**

54  
55 This is a generic instrument measuring an individual's health status<sup>9 13</sup>. It has five  
56 dimensions (questions) on mobility, usual activities, self-care, pain and discomfort, and  
57  
58  
59  
60

1  
2  
3 anxiety and depression. Three dimensions have three possible responses: no problems,  
4 some problems, and inability. The responses for the other two dimensions are: no  
5 problems, moderate problems and extreme problems. Each response is coded from 1-3 and  
6 combined as a series of five digits describing the 'EQ-5D self-reported health state' or 'EQ-  
7 5D profile'<sup>14</sup>. The EQ-5D-3L has 234 possible health states. EQ-5D profiles can be converted  
8 to a single number, the 'EQ-5D value', "1" represents full health and "0" dead<sup>15</sup>. Values <0  
9 indicate a health state worse than death. Overall health status is recorded on a visual  
10 analogue scale, from 0 (worst imaginable health) to 100 (best imaginable health).  
11  
12  
13

#### 14 FROM-16

15 This questionnaire measures current QoL impact on a healthy person of having a partner or  
16 family member with a health condition<sup>10</sup>. It can be completed by anyone over the age of 18  
17 years, concerning the impact of the health condition of a patient of any age. There are 16  
18 questions covering the domains "Emotional" (six questions) and "Personal and social life"  
19 (ten questions). Each question is scored from 0-2 (0=not at all, 1=a little, 2=a lot), with a  
20 score range of 0-32, "0" meaning no impact and "32" meaning greatest possible impact.  
21  
22  
23

#### 24 Study design

25  
26 Multiple survey versions were piloted in November 2020, enabling refining wording for  
27 clarity, ensuring ease of use and to identify and resolve technical issues. Feedback  
28 confirmed that the questionnaires were easy to answer and most persons with ME/CFS  
29 completed the EQ-5D questionnaire within five minutes. The preferred order of  
30 questionnaires was identified, with the questionnaire for the person with ME/CFS presented  
31 first followed by the family member/partner questionnaire, with the option to return later.  
32 Following participant comments, a few minor changes were made, for instance to obviate  
33 any confusion resulting from having more than one family member with ME/CFS.  
34  
35  
36

37 The participant eligibility criteria were being a person with ME/CFS aged 18 or over.  
38 Participating family members also had to be aged 18 years or over. Data was only analysed  
39 if the person with ME/CFS confirmed diagnosis with a health care professional.  
40 Informed consent was obtained via a tick box question for the participant with ME/CFS.  
41 Participants completed basic demographic questions including if they had a diagnosis of  
42 ME/CFS from a healthcare professional. To ascertain how many met ME/CFS criteria,  
43 participants were asked to select their symptoms from a tick box list adapted from the  
44 systemic exertion intolerance disease (SEID) US Institute of Medicine criteria for ME/CFS<sup>16</sup>, a  
45 clinical diagnostic tool comprising five ME/CFS symptoms. The criteria include technical  
46 language, hence a plain English version was devised specifically for this study. ME/CFS is  
47 diagnosed if all the first three symptoms and at least one of the last two are present.  
48  
49  
50  
51

52 Participants answered the EQ-5D-3L and then chose either their partner or another family  
53 member to complete the survey second part. The family member/partner could participate  
54 in the study immediately, or was invited via email link by the person with ME/CFS. Similar to  
55 the person with ME/CFS, a link to the participant information was provided and consent was  
56 given via a tick box question. Family members/partners then completed basic demographic  
57 data questions and the FROM-16. The recruitment time window was the only limit to the  
58 number of participants.  
59  
60

## Statistical analysis

Only data from participants with ME/CFS who reported a formal diagnosis by a health care professional (HCP) and their family members were included in the final analysis. Duplicate entries were identified by email address and matching demographics: only the second was analysed. Microsoft Excel, SPSS and GraphPad Prism v9 were used for data handling and statistical analysis, involving descriptive statistics and non-parametric statistical tests including Spearman rank correlation coefficient.

## RESULTS

The survey was carried out from 1 December 2020 to 31 March 2021. It was started 2980 times. One participant withdrew consent; therefore, 2979 records were generated. 2668 participants completed the first part of the survey, including the EQ-5D-3L. 1479 family members/partners completed the second part of the survey. Only the 1479 records that were fully completed by both patient and family members/partners were analysed further. 25 records were excluded either because they were duplicates (n=22) or for other reasons (n=3). From the remaining 1454 records a further 36 were excluded for not having a formal diagnosis of ME/CFS from a health care professional. The final analysis included 1418 survey responses representing 2836 participants (persons with ME/CFS and their family member/partner) (Figure 1).

### Demographic profile of participants

Table 1 shows the participant demographics. Persons with ME/CFS and their family members worldwide participated in the study however most responses came from the UK (58.8%) and other English-speaking countries, including the USA (11.2%), Canada (5%) and Australia (5.8%) (Table 2). The average time since diagnosis of ME/CFS was 13.9 years, (median 11) with 15 patients diagnosed for 1 year and 8 for >50 years.

**Table 1: Participant demographic characteristics**

|                      | Person with ME/CFS | Family member |
|----------------------|--------------------|---------------|
| Number               | 1418               | 1418          |
| Time since diagnosis | 13.9 years         | n/a           |
| Mean Age             | 45.8 (18-81)       | 51.9 (18-87)  |
| Female               | 1214 (85.6%)       | 504 (35.5%)   |
| Male                 | 196 (13.8%)        | 902 (63.6%)   |

|                                                            |             |             |
|------------------------------------------------------------|-------------|-------------|
| Other                                                      | 8 (<1%)     | 12 (<1%)    |
| Separate household                                         |             | 149 (10.5%) |
| Lives alone                                                | 158 (11.1%) |             |
| <b>Relationship of person with ME/CFS to family member</b> |             |             |
| Partner/Spouse                                             |             | 991 (69.9%) |
| Parent                                                     |             | 76 (5.4%)   |
| Sibling                                                    |             | 288 (20.3%) |
| Child                                                      |             | 28 (1.9%)   |
| Other                                                      |             | 35 (2.5%)   |
| >1 Family member has ME/CFS                                |             | 160 (11%)   |
| Family member has ME/CFS                                   |             | 49 (3%)     |

**Table 2: Countries of residence (participants with ME/CFS)**

| Patient country          | Number |
|--------------------------|--------|
| United Kingdom           | 834    |
| United States of America | 159    |
| Australia                | 82     |
| Canada                   | 71     |
| Norway                   | 40     |
| Germany                  | 34     |
| Netherlands              | 32     |
| Sweden                   | 31     |

---

|                     |    |
|---------------------|----|
| Ireland             | 24 |
| New Zealand         | 24 |
| Belgium             | 14 |
| Italy               | 10 |
| Spain               | 10 |
| Japan               | 9  |
| Denmark             | 8  |
| France              | 6  |
| South Africa        | 6  |
| Finland             | 5  |
| Switzerland         | 5  |
| Austria             | 3  |
| Portugal            | 2  |
| China               | 1  |
| Croatia             | 1  |
| Czech Republic      | 1  |
| Ghana               | 1  |
| Iceland             | 1  |
| Poland              | 1  |
| Senegal             | 1  |
| Trinidad and Tobago | 1  |
| Uruguay             | 1  |

---

Reflecting the female preponderance for ME/CFS, far more females responded (85.6%) than male, eight did not answer this question. Only 11.1% (n=158) of participants with ME/CFS lived alone. Those that lived with others mainly shared with a life partner or family member, with only 14 people stating they lived with people outside that description. Most family members who participated lived with the person with ME/CFS, with only 149 living in a separate household and one unknown.

160 family members reported having more than one family member with ME/CFS and 49 family members were themselves ME/CFS sufferers. Two persons failed to answer this question.

All persons with ME/CFS completed five questions based on SEID criteria (Table 3). Most respondents, already diagnosed by a HCP, also met these diagnostic criteria. However, 93 respondents lacked the symptoms for the SEID ME/CFS diagnosis criteria but stated they had a medical diagnosis, and therefore were included in the analysis. 80 participants did not have one or more of the three required symptoms for diagnosis, including less able to do normal things (n=14), symptoms worse after physical, mental or emotional activity (n=12), sleep unrefreshing or disturbed (n=54). 12 stated they did not have two of the three criteria, with one stating they experienced none of the five criteria. Of the 36 (2.5%) people without an ME/CFS medical diagnosis not included in the data analysis, most reported ME/CFS diagnosis criteria symptoms. 604 (42.6%) of the ME/CFS participants reported having another chronic health condition.

**Table 3: Participants with ME/CFS and the SEID criteria**

| Symptom                                            | Yes          | No          |
|----------------------------------------------------|--------------|-------------|
| Less able to do normal things                      | 1404 (99%)   | 14 (1%)     |
| Worse after physical, mental or emotional activity | 1406 (99%)   | 12 (1%)     |
| Sleep unrefreshing/disturbed                       | 1364 (96.2%) | 54 (3.8%)   |
| Brain fog                                          | 1382 (97.5%) | 36 (2.5%)   |
| Worse symptoms/dizziness when upright              | 1103 (77.8%) | 315 (22.2%) |

## EQ-5D health profile of persons with ME/CFS

Figure 2 gives the EQ-5D results. Strikingly 98.5% (n=1397) of participants had problems performing their usual activities. Over half (n=775) were unable to perform their usual activities at all. Pain was the next most affected dimension with 93.9% (n=1331) experiencing some (n=976) and extreme (n=355) pain and discomfort. Mobility was affected in 88.6% (n=1256), with participants experiencing some problems (n=1063) with walking or confined to bed (n=193). In terms of self-care, 67.3% (n=954) had some problems or were unable to wash or dress themselves. Anxiety and depression was the least affected dimension, as 40.6% (n=576) participants reported they were not anxious or depressed at all, whilst 59.4% were either moderately (n=678) or extremely (n=164) anxious or depressed. The average EQ-5D VAS score of ME/CFS patients was 33.7, (SD 17.5, median 47.5, range 0-94) (Figure 2b).

Of the possible 234 EQ-5D-3L profiles, participants with ME/CFS expressed 94 unique profiles. Only three participants had a profile 11111, indicating no problems in any dimension. Similarly, 12 participants had a profile 33333 indicating extreme problems in all dimensions. Ten profiles accounted for 56.5% of EQ-5D-3L profiles (Table 4). The profile 22321 was the most frequent (n=128) indicating some problems with mobility and self-care, inability to perform usual activities, moderate pain/discomfort and no anxiety/depression. 22222 and 22322 were found in equal measure (n=117) the only difference is that 22222 means moderate problems in all dimensions whereas 22322 indicates moderate problems in all dimensions and inability to perform usual activities.

**Table 4: The 10 most frequent EQ-5D health states of ME/CFS participants, sorted according to EQ-5D value severity**

|              | EQ-5D state | EQ-5D Value | Frequency | % Frequency |
|--------------|-------------|-------------|-----------|-------------|
| Least Severe | 21221       | 0.659       | 72        | 5.07        |
|              | 21222       | 0.596       | 86        | 6.06        |
|              | 22221       | 0.566       | 70        | 4.93        |
|              | 22222       | 0.503       | 117       | 8.25        |
|              | 21321       | 0.394       | 55        | 3.87        |
|              | 21322       | 0.331       | 42        | 2.96        |
|              | 22321       | 0.301       | 128       | 9.02        |
|              | 22322       | 0.238       | 117       | 8.25        |

|                    |       |       |    |      |
|--------------------|-------|-------|----|------|
|                    | 22331 | 0.214 | 43 | 3.03 |
| <b>Most Severe</b> | 22332 | 0.151 | 77 | 5.43 |

The EQ-5D-3L profile can be converted into a single summary number or EQ-5D value allowing for comparison with the general population. Our results demonstrate strikingly lower EQ-5D values in each age group for persons with ME/CFS compared to the general UK population<sup>17</sup>. Similarly, persons with ME/CFS reported much higher percentages of 'problems' in each of the EQ-5D dimensions compared to the UK population norm (Figure 3).

### Quality of life of family members/partners of participants with ME/CFS

The FROM-16 examined the effects of a person's ME/CFS on their family member's emotions and personal/social life. Family members, on average, scored 7.62 (SD=2.81, median=8, max=12,) in the emotional domain and 10.31 (SD=4.9, median=10, max=20) in the personal and social life domain (Figure 4). The average overall FROM-16 score (Figure 5) was 17.93 out of a total of 32 (SD=6.95, median=18) demonstrating a major impact of ME/CFS on family members.

ME/CFS had a significant impact on family member's emotions. Of the 1418 respondents, 96.1% (n=1362) felt worried due to their family member's ME/CFS, making it the most affected emotion. Frustration and sadness with their family member's ME/CFS were also highly prevalent with 93% (n=1369) experiencing frustration and 92.9% (n=1317) experiencing sadness. 84.7% (n=1201) found caring for their family members difficult, 73.4% (n=1041) found it difficult to talk to someone about their thoughts and 70% (n=994) of respondents were a little or a lot angry because of their family member's ME/CFS.

In the personal and social domain, the greatest impact was in the area of family activities with 92% (n=1302) respondents reporting family activities affected. Similarly, 85.3% (n=1210) experienced problems with holidays. 72.2% (n=1025) stated their sex life was affected and 77.3% (n=1096) felt their finances were impacted in that their family expenses increased. 68.6% (n=973) of respondents found it hard to find time for themselves. Sleep, work or study, and family relationships were almost equally affected with 66.9% (n=948) reporting a negative impact on their sleep, 65.7% (n=932) a negative impact on their work or study and 63.8% (n=904) found their family relationships with other family members were affected due to their family member's ME/CFS. Everyday travel and eating habits of family members were the least affected of all the areas, with 54.8% (n=777) indicating a problem with everyday travel and 51.8% (n=735) reporting an effect on their eating habits.

In order to determine the relationship between the person with ME/CFS and their family members quality of life, we used Spearman's Rank Correlation as the data was not normally distributed. We found a significant negative correlation between the total FROM-16 score of



1  
2  
3 family members and the patients VAS score ( $P<0.0001$ ,  $R=-0.3467$ ) (Figure 6). Furthermore,  
4 a similar moderate but significant negative correlation was calculated using the total FROM-  
5 16 score and the EQ-5D value of patients ( $P<0.0001$ ,  $R=-0.411$ ,) (Figure 6), supporting the  
6 fact that family member quality of life is significantly impacted by a family member's  
7 ME/CFS.  
8  
9

10 The inherent biases in the method of recruitment to this study make it difficult to draw any  
11 meaningful comparison between FROM-16 scores from different countries or regions of the  
12 world. However, when examined, the mean FROM-16 score from UK was 17.79 (SD=6.99,  
13 median=18, n=834), Europe 18 (SD=6.99, median=18, n=228), North America 18.38  
14 (SD=6.92, median=18.5, n=230) and Rest of World 17.96 (SD=6.68, median=18, n=126). The  
15 mean EQ5D value from the different regions were also similar with the UK mean of 0.359  
16 (SD=0.218, median= 0.301), Europe mean 0.351 (SD= 0.205, median=0.267), North America  
17 mean 0.341 (SD= 0.201, median=0.264) and Rest of World mean EQ-5D value 0.389  
18 (SD=0.217, median=0.264).  
19  
20  
21  
22

## 23 DISCUSSION

24  
25  
26 To the best of our knowledge this is the largest study on the impact on the QoL of persons  
27 with ME/CFS and their family members. Our study confirmed that ME/CFS has a  
28 considerable negative impact on QoL. The most common EQ-5D-3L profiles demonstrated  
29 that people with ME/CFS experience problems across all domains with similar severity: the  
30 problems are not confined or localised to one aspect. None of the ten most frequent  
31 profiles in our survey reported a level 3 "a lot" for anxiety. The average EQ VAS score in our  
32 study was 33.8 (SD=17.5, median=47.5). The higher the EQ VAS, the better the QoL. The  
33 mean EQ VAS for the representative UK population is 82.75. Our data demonstrate that the  
34 QoL of family members of persons with ME/CFS is more impaired than in other conditions<sup>18</sup>  
35 <sup>19</sup>. In our study, in the Emotional domain of FROM-16, worry was the most frequently  
36 impacted item (96.1%, n=1362), frustration was experienced by 93% (n=1319) and sadness  
37 by 92.9% (n=1317).  
38  
39  
40  
41

42 The study strengths include the patient co-design, with patient involvement at the heart of  
43 the research team, wide international dissemination of the survey and the very large  
44 numbers of participants. There has been controversy over diagnostic criteria for ME/CFS.  
45 Participants with ME/CFS were only included in the data analysis if they reported a  
46 healthcare professional diagnosis of ME/CFS. Of these participants, 93.4% also fulfilled the  
47 SEID criteria for ME/CFS diagnosis. The four required symptoms of the 2021 ME/CFS NICE  
48 guideline criteria<sup>20</sup> are similar to the three required symptoms, and the first of the two  
49 additional symptoms, of the SEID diagnostic criteria. This diagnostic confirmation is a major  
50 study strength; however, a limitation of the study was that it was not possible to  
51 independently verify that a health care professional diagnosis of ME/CFS had been made.  
52 Other limitations include open participation recruitment bias towards English speaking self-  
53 selected people active on social media. This may not be representative of the overall  
54 ME/CFS population. Those more severely affected may not have responded because of  
55 ME/CFS's debilitating physical effects. Conversely, they may have been more motivated to  
56 take part. Online delivery precluded checking whether assistance was given completing  
57  
58  
59  
60

forms or whether the family member or patient allowed others to see their responses. Lack of anonymity within the family may have influenced some responses. Data on ethnic background was not collected.

In contrast to the high level of QoL impact revealed in our study, the EQ-5D-3L profiles from a survey in England<sup>17 21</sup> reported that 56.2% of the general public have an EQ-5D profile of 11111, indicating no problems in any dimension. An EQ-5D profile can be converted into an EQ-5D value, with a value of 1 indicating the best possible health. The mean EQ-5D value for persons with ME/CFS in our study was 0.36 (SD=0.21). In comparison, the mean EQ-5D value for the UK representative sample is 0.86 (SD=0.23)<sup>22</sup>. Myers et al<sup>23</sup> in their ME/CFS study reported a mean EQ-5D value of 0.56 (SD=0.35), representing a QoL impact between the UK representative sample and our ME/CFS participants. Hvidberg et al<sup>2</sup> reported an EQ-5D mean value of 0.47 in Danish ME/CFS patients, much lower than the representative Danish population mean of 0.85. Their study demonstrated that the EQ-5D value for ME/CFS was the lowest of 20 chronic conditions. Nacul et al<sup>24</sup>, using the SF-36 in a UK population also demonstrated that the QoL of people with ME/CFS was lower than 10 other chronic conditions. Our findings of greatly impaired QoL are consistent with these studies. The EQ VAS score in our study was in contrast with a higher VAS score of 54.3 (SD=23.3) in the Meyers study<sup>23</sup>. This discrepancy may be explained by the higher proportion of patients from the UK in our study. Brenna et al<sup>25</sup> conducted a survey of persons with ME/CFS in Italy, Latvia and the UK. Latvian respondents (n=74) reported the least impaired QoL (VAS mean=57.3, SD=16.3), Italian respondents (n=84) had a mean VAS score of 34.6 (SD=20.8) and the UK respondents (n=440) had a mean score of 31.5 (SD=19.8). A Swedish study by Jonsjo et al<sup>26</sup> involving 106 patients with ME/CFS reported a mean EQ-5D value of 0.3 (SD=0.33) and a mean VAS score of 29.8 SD=15.7).

Most previous studies on the impact on family members of persons with ME/CFS have focused on children with ME/CFS<sup>27-29</sup> making comparisons difficult, however in a pilot study, Brittain et al<sup>4</sup> compared the impact of ME/CFS on UK patients and on family members, using WHOQoL-BRef and FROM-16. That study demonstrated that poor QoL of the person with ME/CFS is associated with a high impact on the QoL of family members. There was no significant difference ( $p = 0.07$ ) between the mean family impact for the Brittain study (mean FROM-16 score = 19.9, n=42) compared with our current international study (mean score = 17.9, n=1418). Chantarasap et al<sup>18</sup> assessed the impact on the QoL of family members of 248 patients diagnosed with various different cancers including hematologic malignancies. The mean FROM-16 score was 11.75 (significantly lower than in our study  $P < 0.0001$ ) with the mean scores in the Emotional domain = 4.1, and Personal and social life domain = 7.1. The mean FROM-16 scores in our study indicate that family members of patients with ME/CFS have a much lower QoL. In a recent cross-sectional international study<sup>19</sup> measuring the impact of COVID-19 on survivors and their partners or family members, the mean FROM-16 score at 15 (n=735) was also high, but significantly less impacted than in our study ( $p < 0.0001$ ). The mean symptom duration for post covid symptoms was 12.8 weeks, but it is clear that a subset of long COVID patients matching ME/CFS diagnostic criteria is now emerging and a repeat study of those who remain symptomatic after a year would be interesting.

1  
2  
3 The median EQ-5D values and FROM-16 scores from the UK, Europe, North America and the  
4 Rest of the World are very similar, emphasising the uniform impact experienced by family  
5 members across the world. However, it is not possible to be certain of the generalisability of  
6 the data due to the recruitment selection bias.  
7  
8

9 ME/CFS needs to be acknowledged as a serious disease, causing significant impact on health  
10 and quality of life, not only of the individual but also of their family. Education for  
11 healthcare practitioners must be updated to reflect this. It would be possible to screen for  
12 these impacts using EQ-5D or FROM-16 in routine clinics. The medical encounter can be  
13 vastly improved by acknowledging the impact on family members and providing practical  
14 advice and support to both people with ME/CFS and their family members.  
15  
16

### 17 **Unanswered questions and future research**

18  
19  
20 Not all people with ME/CFS have a family member or partner to complete the FROM-16.  
21 Several individuals wrote to the research team explaining their isolation, difficulty  
22 maintaining family relationships and/or lack of empathy of family members. Further  
23 research is needed to understand the wider impact of ME/CFS on families and on  
24 individuals.  
25  
26

27 FROM-16 score meaning descriptors have not yet been developed, therefore a logical  
28 arbitrary assumption has been made of the scale of severity as expressed by the FROM-16  
29 scores. Our large dataset may allow further work towards categorising family impact scores  
30 and increasing the international validity of FROM-16. A study of this scale provides direction  
31 for future qualitative and focus group research to identify why certain aspects of family QoL  
32 are impacted more than others and to identify and develop supportive interventions to  
33 make the greatest impact. FROM-16 could be used as an outcome measure to assess such  
34 novel interventions.  
35  
36  
37  
38  
39

### 40 **CONCLUSIONS**

41  
42 Despite the limitations of selection bias in open participation surveys, this research has  
43 revealed the significant worldwide burden of ME/CFS on the QoL of people with ME/CFS  
44 and on their family members' QoL. Recognising this impact has the potential to lead to  
45 improvements in the standard of care and compassion we offer to our ME/CFS patients and  
46 families.  
47  
48

### 49 **Contributors**

50  
51 JV: conception of study, study design, data analysis, writing, reviewing and final approval of  
52 manuscript. NM: study design, data analysis, writing, reviewing and final approval of  
53 manuscript. RKS: data analysis, writing, reviewing and final approval of manuscript. RE:  
54 study design, writing, reviewing and final approval of manuscript. AYF: study design, writing,  
55 reviewing and final approval of manuscript. The corresponding author attests that all listed  
56 authors meet authorship criteria and that no others meeting the criteria have been omitted.  
57  
58

### 59 **Acknowledgments**

We wish to thank that the many patients and family members/partners who contributed to this study. We would like to thank Action for M.E. and The M.E. Association who publicised the study in their patient magazines as well as online. We wish to thank patient support organisations approached, many of whom publicised the study, including Forward ME, ME Research UK, ReMEember, Tymes Trust, BRAME, WAMES, MESiG, MEAction, IcanCME, SolveME, DecodeME, Edmesh, CureME. Deutsche Gesellschaft für ME/CFS Associazione Italiana, Emerge Australia, EUROMENE, European ME Alliance, ME Foreningen, Association Française du Syndrome de Fatigue Chronique, ME félag Íslands, RME, Irish ME Trust, Hope 4 ME & Fibro NI, Norges ME Forening, International Alliance for M.E., Solve CFS/ME, MECFS Foundation South Africa, ACAF, ME/CFS Friendship group in Gloucestershire, Irish ME/CFS Association, Leeds ME network, Lost Voices Stiftung, ME Trust, ME CFS phone support group ME/cvs Vereniging, ME/ CVS-Stichting Nederland, National CFIDS Foundation, New Jersey ME/CFS Association, Oxfordshire Myalgic Encephalomyelitis Group for Action, Pandora ReMEemberCFS, Steungroep ME en Arbeidsongeschiktheid, Sussex & Kent ME/CFS Society The Grace Charity for M.E., WISCONSIN MYALGIC ENCEPHALOMYELITIS / CHRONIC FATIGUE SYNDROME ASSOCIATION, Fibroamérica, MECFS South Australia, ME CFS and Lyme Association of WA, Far North Coast MECFS Association, ME/CFS/FM Support Association QLD, ACT ME/Chronic Fatigue Syndrome, ME/CFS Australia, Japan ME Association Društvo za fibromialgijo, ACSFCM, ME/CFS Schweiz, The Rocky Mountain CFS/ME & FM Association. We wish to acknowledge MEpedia which was used as a resource to identify national and international ME/CFS organisations.

### **Funding**

This research received no specific grant from any funding agency in the public, commercial or not-for-profit sectors.

### **Competing interests**

AYF is joint copyright owner of FROM-16 a family member is deputy chair of the NICE ME/CFS guideline committee. JV has been on an Advisory board for Amgen and received honorarium from L'Oreal and support for conference attendance from UCB pharma . NM is Chair of the CMRC education working group for ME/CFS Research Collaborative, member of Forward ME, director of Doctors with ME, witness for NICE education, member of ME education working groups ICANCME (Canada) and the Centre for Solutions (USA), a workshop participant in the James Lind Alliance ME/CFS Priority Setting Partnership and a supporter of Action for ME. NM has received consultancy fees from Learn about ME Project and Ono Pharmaceuticals as well as honorarium from GW4 ME/CFS Carers Project. RE is a member of the Patient Advisory Group to the CMRC, a member of the ME/CFS Friendship group in Gloucestershire, a workshop participant in the James Lind Alliance ME/CFS Priority Setting Partnership, a supporter of Action for ME and is both a patient with ME/CFS and a family member of a patient with ME/CFS. RKS has nothing to declare.

### **Data availability statement**

The authors agree to share data on reasonable request.

## References

1. Eaton-Fitch N, Johnston S, Zalewski P, et al. Health-related quality of life in patients with myalgic encephalomyelitis/chronic fatigue syndrome: an Australian cross-sectional study. *Quality of Life Research* 2020;29(6):1521-31.
2. Falk Hvidberg M, Brinth LS, Olesen AV, et al. The health-related quality of life for patients with myalgic encephalomyelitis/chronic fatigue syndrome (ME/CFS). *PloS one* 2015;10(7):e0132421.
3. Experiences of Living with Severe Chronic Fatigue Syndrome/Myalgic Encephalomyelitis. Healthcare; 2021. Multidisciplinary Digital Publishing Institute.
4. Brittain E, Muirhead N, Finlay AY, et al. Myalgic Encephalomyelitis/Chronic Fatigue Syndrome (ME/CFS): Major Impact on Lives of Both Patients and Family Members. *Medicina* 2021;57(1):43.
5. Toogood PL, Clau DJ, Phadke S, et al. Myalgic encephalomyelitis/chronic fatigue syndrome (ME/CFS): Where will the drugs come from? *Pharmacological Research* 2021:105465.
6. Lim E-J, Ahn Y-C, Jang E-S, et al. Systematic review and meta-analysis of the prevalence of chronic fatigue syndrome/myalgic encephalomyelitis (CFS/ME). *Journal of translational medicine* 2020;18(1):1-15.
7. Njoku MGC, Jason LA, Torres-Harding SR. The prevalence of chronic fatigue syndrome in Nigeria. *Journal of health psychology* 2007;12(3):461-74.
8. Friedman KJ, Murovska M, Pheby DF, et al. Our evolving understanding of ME/CFS. *Medicina* 2021;57(3):200.
9. Rabin R, Charro Fd. EQ-SD: a measure of health status from the EuroQol Group. *Annals of medicine* 2001;33(5):337-43.
10. Golics CJ, Basra MKA, Finlay AY, et al. The development and validation of the Family Reported Outcome Measure (FROM-16)© to assess the impact of disease on the partner or family member. *Quality of Life Research* 2014;23(1):317-26.
11. Harris PA, Taylor R, Minor BL, et al. The REDCap consortium: Building an international community of software platform partners. *Journal of biomedical informatics* 2019;95:103208.
12. Harris PA, Taylor R, Thielke R, et al. Research electronic data capture (REDCap)—a metadata-driven methodology and workflow process for providing translational research informatics support. *Journal of biomedical informatics* 2009;42(2):377-81.
13. Group TE. EuroQol—a new facility for the measurement of health-related quality of life. *Health policy* 1990;16(3):199-208.
14. Devlin N, Parkin D, Janssen B. Analysis of EQ-5D Profiles. Methods for Analysing and Reporting EQ-5D Data. Cham: Springer International Publishing 2020:23-49.
15. Devlin N, Parkin D, Janssen B. Analysis of EQ-5D Values. Methods for Analysing and Reporting EQ-5D Data. Cham: Springer International Publishing 2020:61-86.
16. CDC. SEID US Institute of Medicine criteria for ME/CFS, 2015. [Internet]. [Available from: <https://www.cdc.gov/me-cfs/healthcare-providers/diagnosis/iom-2015-diagnostic-criteria.html>] accessed 7 June 2021.
17. Szende A, Janssen B, Cabases J. Self-reported population health: an international perspective based on EQ-5D. 2014
18. Chantarasap P, Johns NP, Pairojkul S, et al. Validation of the Thai version of the family reported outcome measure (FROM-16)© to assess the impact of disease on the

- partner or family members of patients with cancer. *Health Qual Life Outcomes* 2019;17(1):32. doi: 10.1186/s12955-019-1091-3
19. Shah R, Ali FM, Nixon SJ, et al. Measuring the impact of COVID-19 on the quality of life of the survivors, partners and family members: a cross-sectional international online survey. *BMJ open* 2021;11(5):e047680.
20. NICE. Myalgic encephalomyelitis (or encephalopathy)/chronic fatigue syndrome: diagnosis and management [Internet]. 2021 [Available from: <https://www.nice.org.uk/guidance/ng206> accessed 10 March 2022.
21. Feng Y, Devlin N, Herdman M. Assessing the health of the general population in England: how do the three- and five-level versions of EQ-5D compare? *Health Qual Life Outcomes* 2015;13:171-71. doi: 10.1186/s12955-015-0356-8
22. Kind P, Hardman G, Macran S. UK population norms for EQ-5D, York Centr for Health Economics: University of York, 1999.
23. Myers C, Wilks D. Comparison of Euroqol EQ-5D and SF-36 in patients with chronic fatigue syndrome. *Quality of Life Research* 1999;8(1):9-16. doi: 10.1023/A:1026459027453
24. Nacul LC, Lacerda EM, Campion P, et al. The functional status and well being of people with myalgic encephalomyelitis/chronic fatigue syndrome and their carers. *BMC Public Health* 2011;11(1):402. doi: 10.1186/1471-2458-11-402
25. Brenna E, Araja D, Pheby DFH. Comparative Survey of People with ME/CFS in Italy, Latvia, and the UK: A Report on Behalf of the Socioeconomics Working Group of the European ME/CFS Research Network (EUROMENE). *Medicina* 2021;57(3):300.
26. Jonsjö MA, Wicksell RK, Holmström L, et al. Identifying symptom subgroups in patients with ME/CFS – relationships to functioning and quality of life. *Fatigue: Biomedicine, Health & Behavior* 2017;5(1):33-42. doi: 10.1080/21641846.2017.1287546
27. Velleman S, Collin SM, Beasant L, et al. Psychological wellbeing and quality-of-life among siblings of paediatric CFS/ME patients: a mixed-methods study. *Clinical child psychology and psychiatry* 2016;21(4):618-33.
28. Missen A, Hollingworth W, Eaton N, et al. The financial and psychological impacts on mothers of children with chronic fatigue syndrome (CFS/ME). *Child: care, health and development* 2012;38(4):505-12.
29. Rangel L, Garralda ME, Jeffs J, et al. Family health and characteristics in chronic fatigue syndrome, juvenile rheumatoid arthritis, and emotional disorders of childhood. *Journal of the American Academy of Child & Adolescent Psychiatry* 2005;44(2):150-58.

## FIGURE LEGENDS

### **Figure 1: Participant numbers**

Flow diagram demonstrating the basis for participant inclusion/exclusion from the analysis of the study. Following this protocol, 1418 ME/CFS patients and their corresponding family members were identified for analysis.

### **Figure 2: EQ-5D health profile**

1  
2  
3 The EQ-5D health states of the person with ME/CFS. (A) Patients were asked about the  
4 following 5 dimensions, each representing a different aspect of health; Usual activities,  
5 pain/discomfort, mobility, self-care and anxiety/depression. Each dimension has 3 levels (1=  
6 no problem, 2= some problem, 3= extreme problem), with the patient indicating their  
7 health state by identifying the level representative of their individual condition. (B) A graph  
8 showing the range of patient answers as they were asked to rate their health on a visual  
9 analogue scale (VAS), with 0 representing worst imaginable health state and 100 best  
10 imaginable health state. The average VAS score of patients with ME/CFS was 33.7.  
11  
12  
13

### 14 **Figure 3: EQ-5D value of ME/CFS vs population norm**

15 The EQ-5D results of ME/CFS patients compared to the UK population norm. (A) The  
16 average EQ-5D Value of varying age groups for ME/CFS participants of our study, compared  
17 to the UK population. (B) The percentage of ME/CFS participants who reported a problem  
18 (level 2 or 3) for each of the EQ-5D dimensions as compared to the UK population norm.  
19  
20  
21

### 22 **Figure 4: Emotional and Personal and Social domain FROM-16 score**

23 FROM-16 score range for the family members of ME/CFS participants in (A) the emotional  
24 domain (max score 12) and (B) the personal/social domain (max score 20), with higher  
25 scores indicating greater impact on the family members quality of life.  
26  
27

### 28 **Figure 5: Overall FROM-16 score**

29 Total FROM-16 scores for the family members of ME/CFS participants. (A) Family members  
30 were asked about different aspects of their lives. Each question had 3 responses (0=not at  
31 all, 1= a little, 2= a lot). Responses have been sorted from the most impact on family  
32 member lives to the least, in both the emotional and personal domains. (B) The FROM-16  
33 score range of family members, with 0 representing no impact on family member quality of  
34 life and 32 the greatest impact of patients ME/CFS on family members quality of life. The  
35 average score in this study was 17.93 out of a possible 32.  
36  
37  
38

### 39 **Figure 6: Correlation of FROM-16 scores with VAS and EQ-5D values**

40 Correlation of total FROM-16 scores with (A) VAS health state of patients and (B) the EQ-5D  
41 Values of patients. (A) Scatter plot illustrating the relationship between total FROM-16  
42 scores and patient EQ-5D VAS. (B) Scatter plot illustrating the relationship between total  
43 FROM-16 scores with the EQ-5D Values of patients. The solid lines represent the linear fit of  
44 data. Figures shows the P value and R value as analysed by Spearman's Rank correlation  
45 test.  
46  
47  
48  
49  
50  
51  
52  
53  
54  
55  
56  
57  
58  
59  
60

1  
2  
3  
4  
5  
6  
7  
8  
9  
10  
11  
12  
13  
14  
15  
16  
17  
18  
19  
20  
21  
22  
23  
24  
25  
26  
27  
28  
29  
30  
31  
32  
33  
34  
35  
36  
37  
38  
39  
40  
41

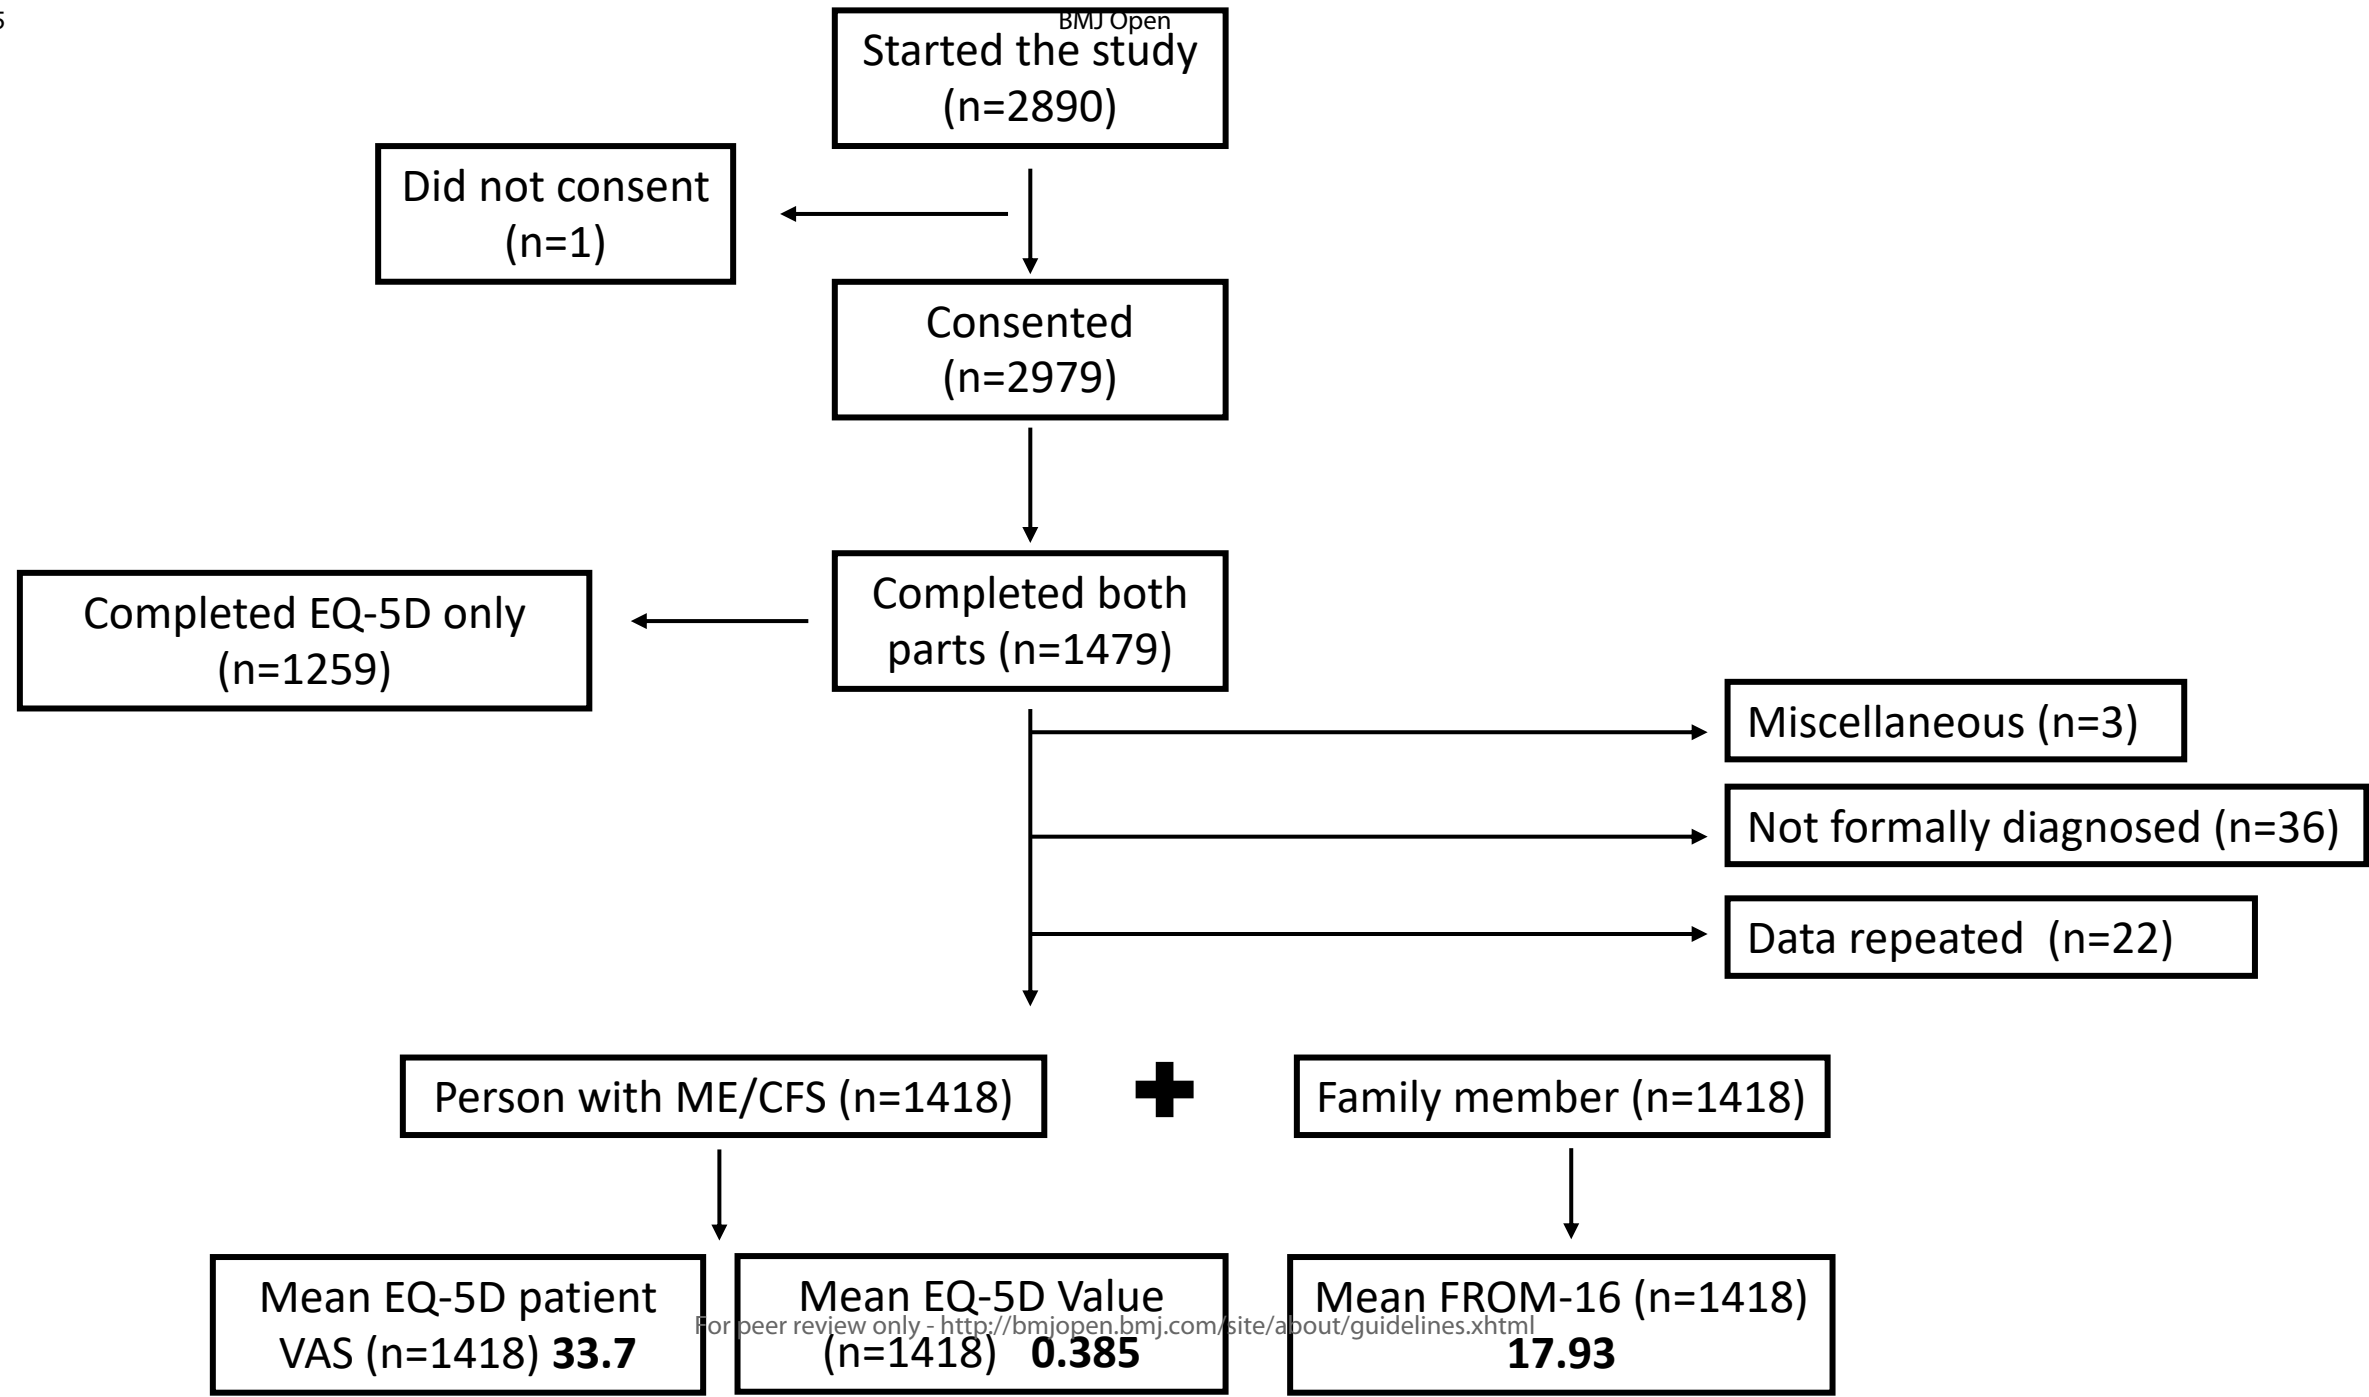



A)

B)

1  
2  
3  
4  
5  
6  
7  
8  
9  
10  
11  
12  
13  
14  
15  
16  
17  
18  
19  
20  
21  
22  
23  
24  
25  
26  
27  
28  
29  
30  
31  
32  
33  
34  
35  
36  
37  
38  
39  
40  
41

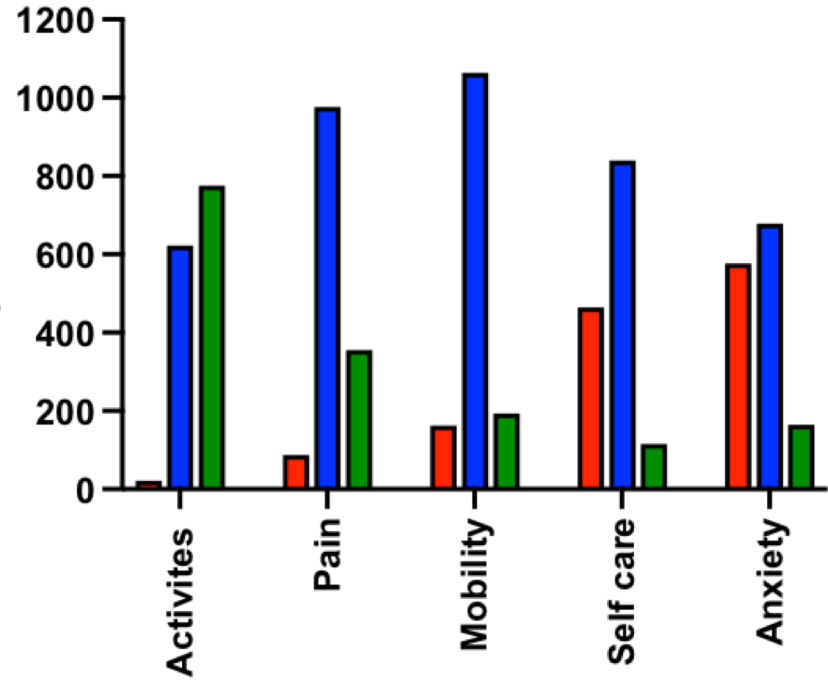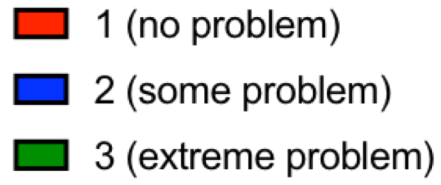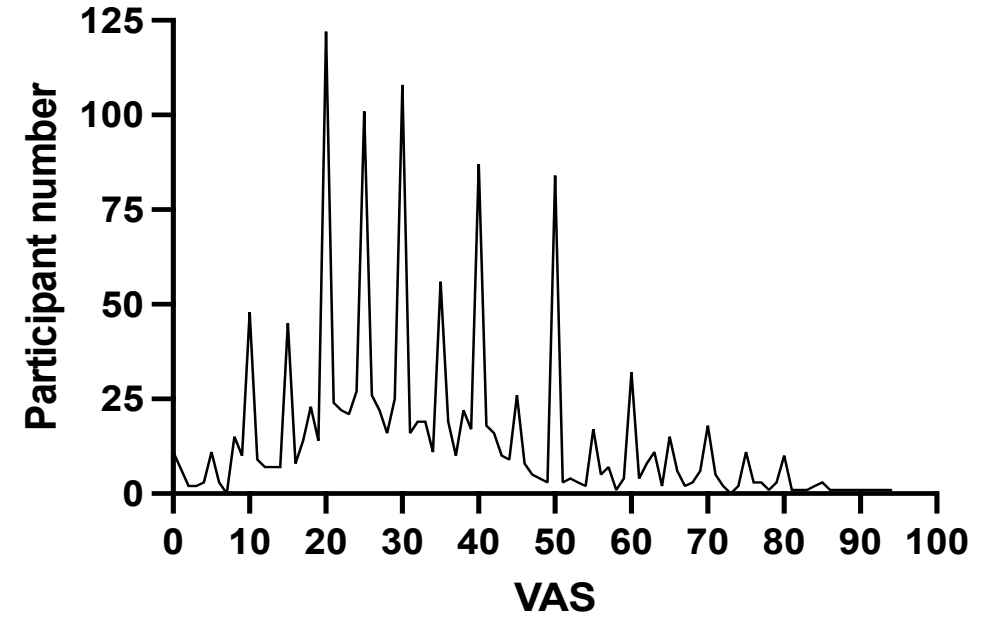

1  
2  
3  
4  
5  
6  
7  
8  
9  
10  
11  
12  
13  
14  
15  
16  
17  
18  
19  
20  
21  
22  
23  
24  
25  
26  
27  
28  
29  
30  
31  
32  
33  
34  
35  
36  
37  
38  
39  
40  
41

A)

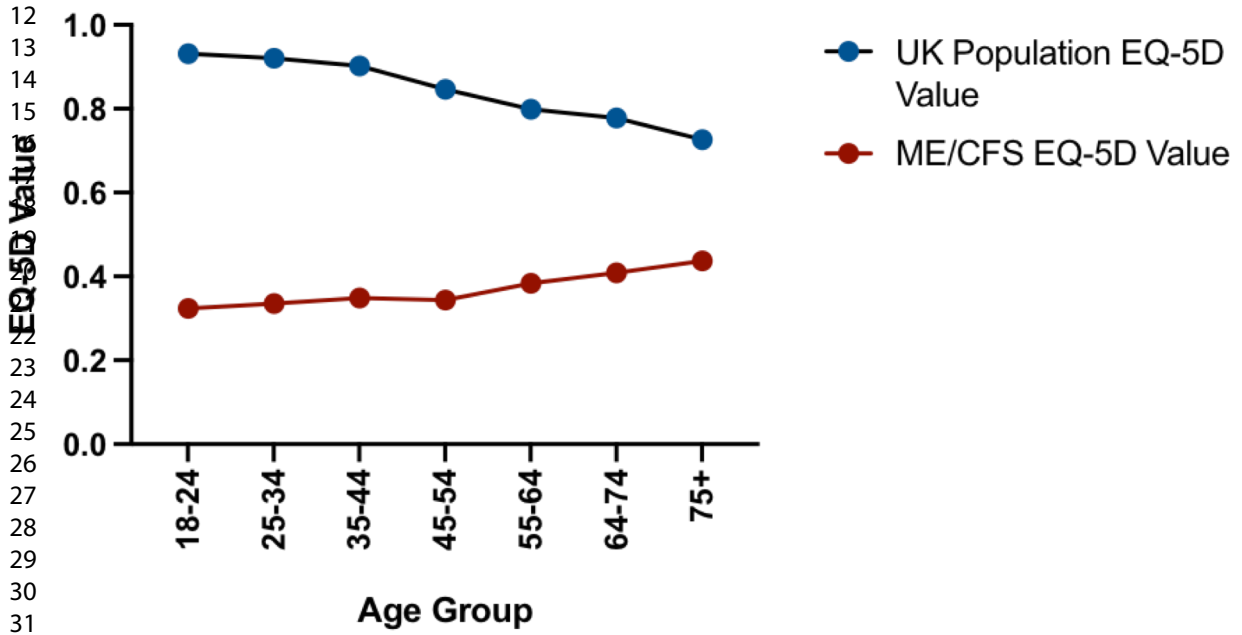

B)

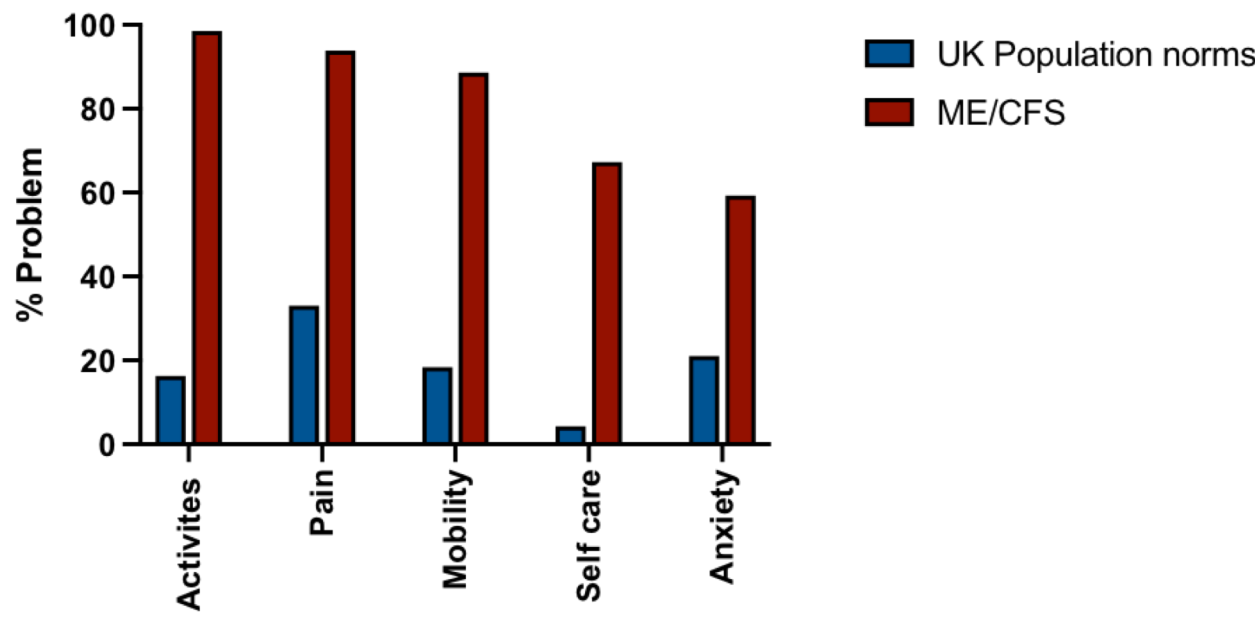

1  
2  
3  
4  
5  
6  
7  
8  
9  
10  
11  
12  
13  
14  
15  
16  
17  
18  
19  
20  
21  
22  
23  
24  
25  
26  
27  
28  
29  
30  
31  
32  
33  
34  
35  
36  
37  
38  
39  
40  
41

A)

**FROM-16 Emotional score**

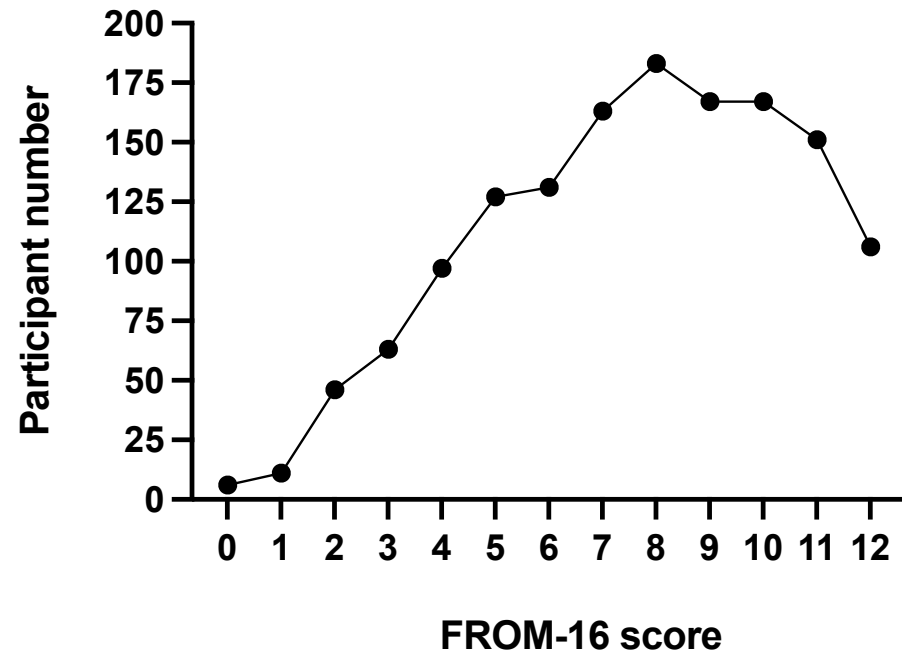

B)

**FROM-16 Personal score**

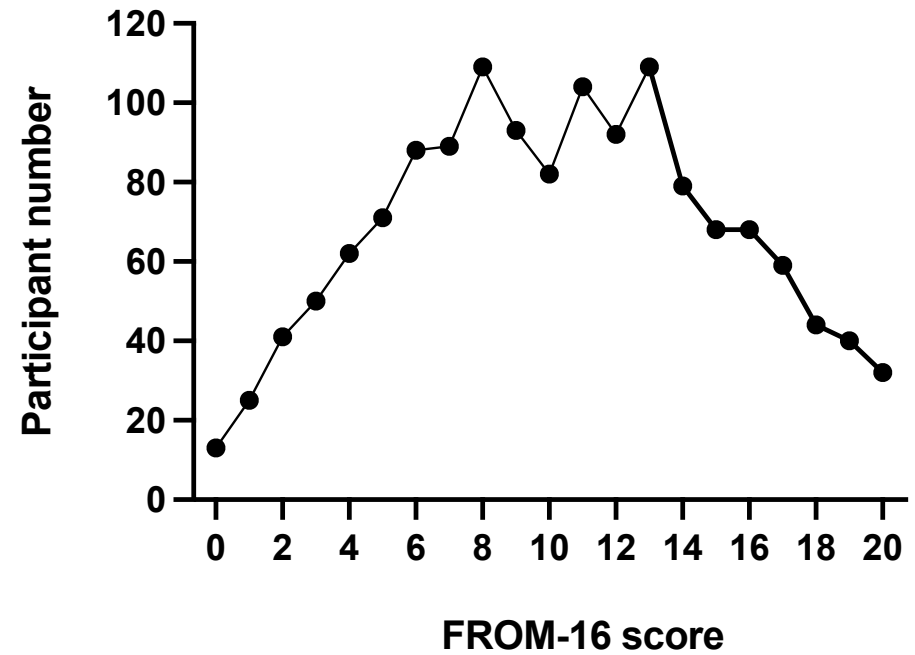

A)

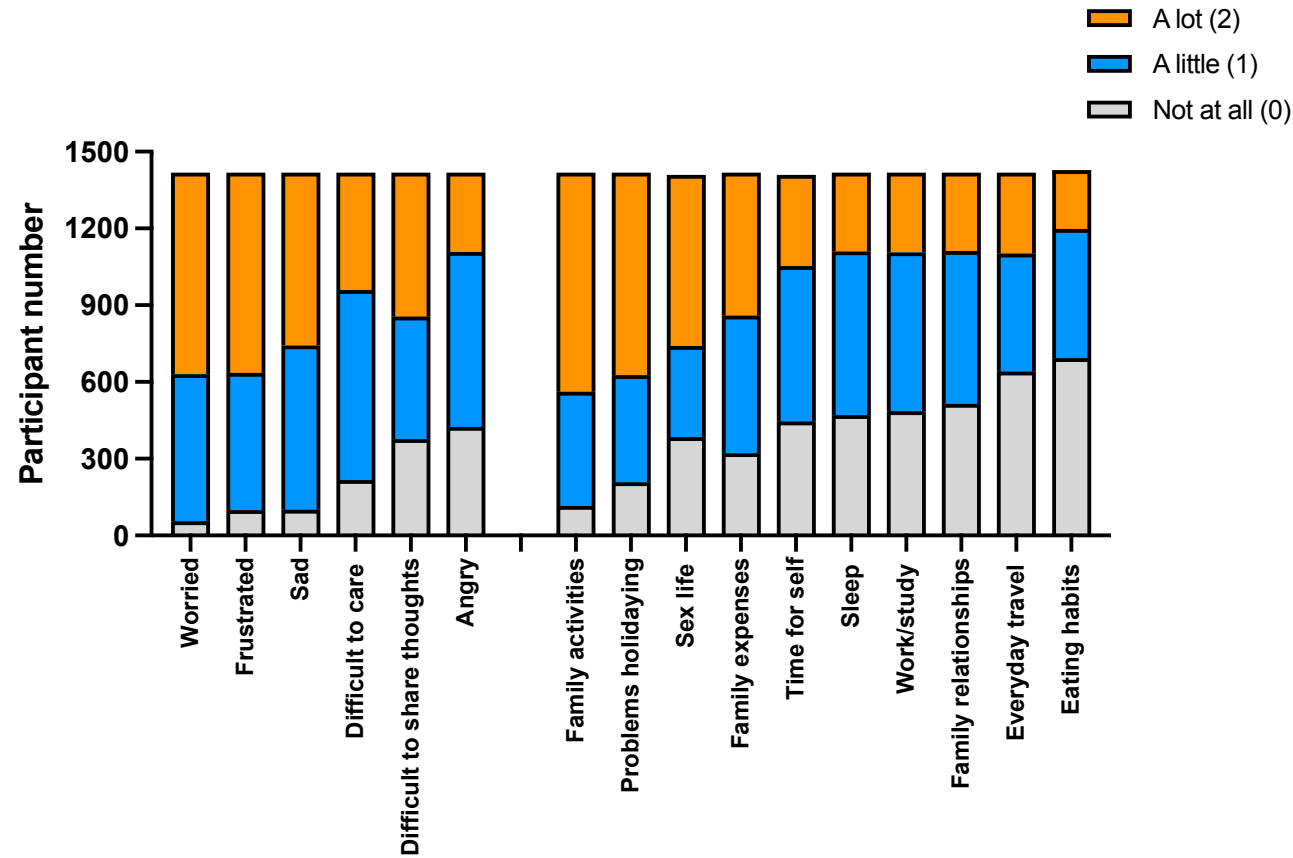

B)



1 A)  
2  
3  
4  
5  
6  
7  
8  
9  
10  
11  
12  
13  
14  
15  
16  
17  
18  
19  
20  
21  
22  
23  
24  
25  
26  
27  
28  
29  
30  
31  
32  
33  
34  
35  
36  
37  
38  
39  
40  
41

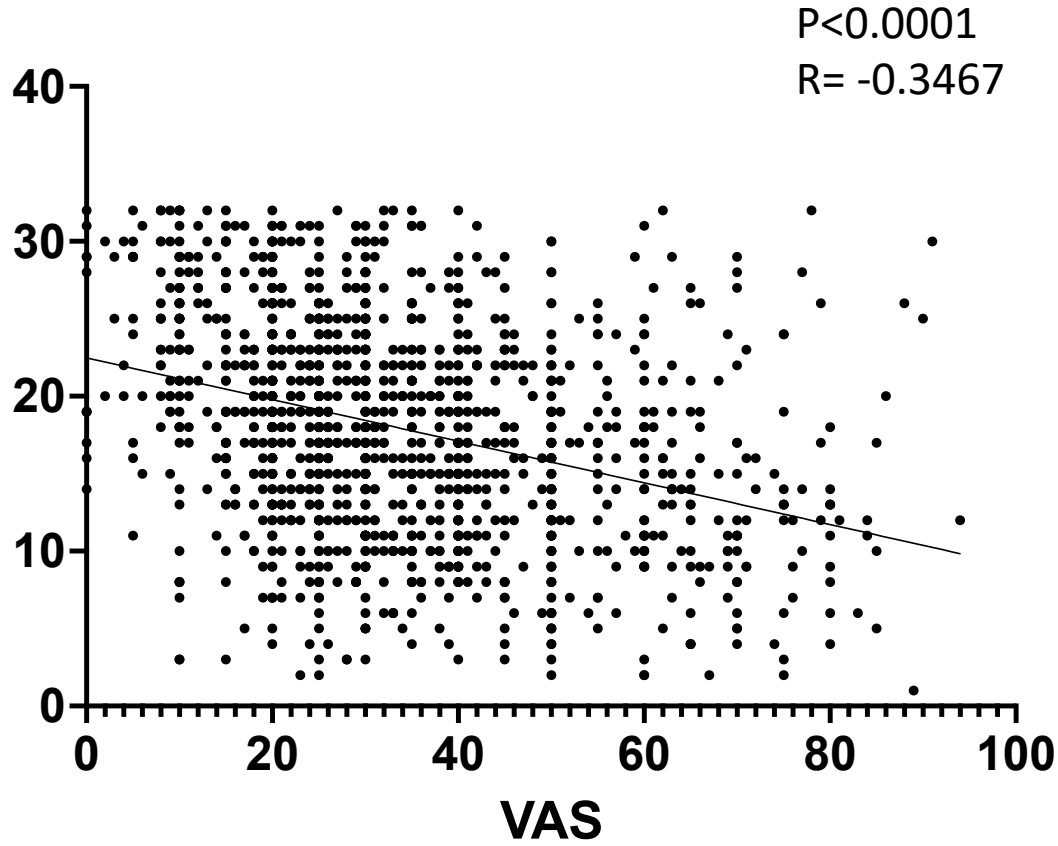

B)

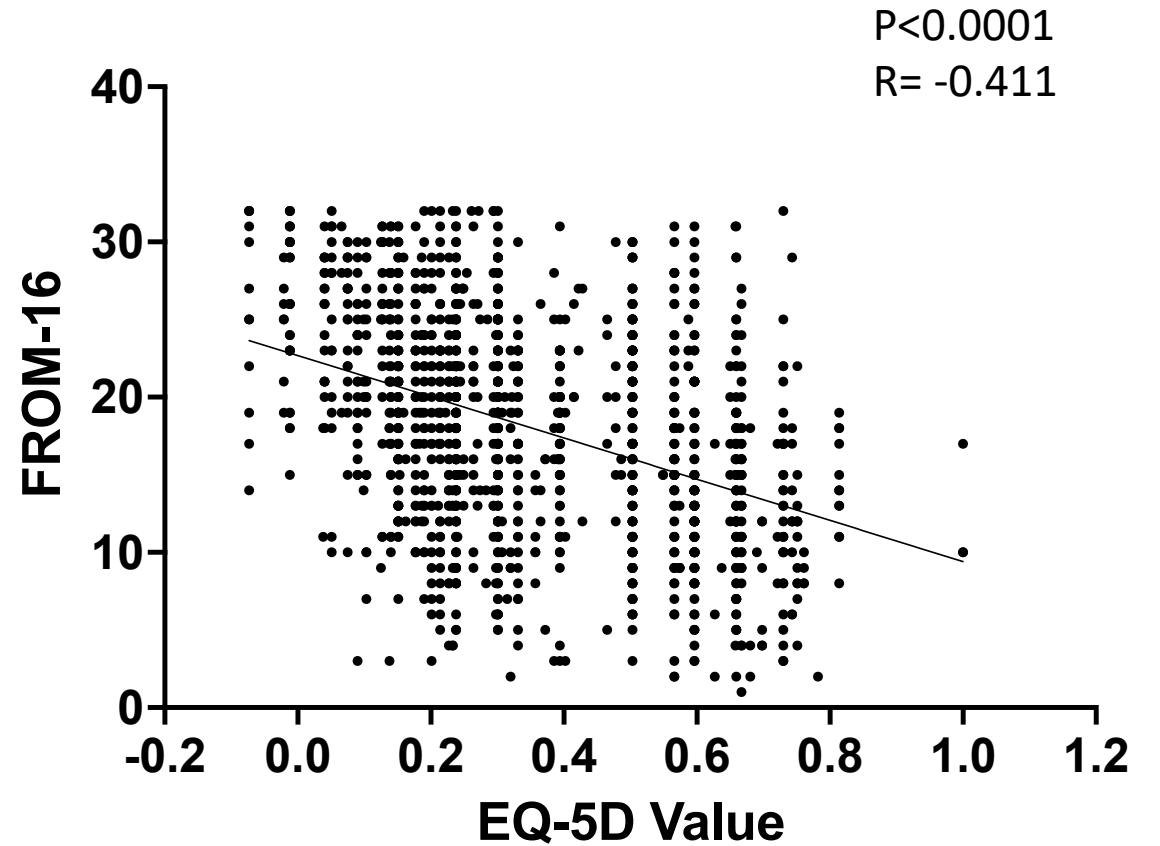

STROBE Statement—Checklist of items that should be included in reports of *cross-sectional studies*

|                              | Item No | Recommendation                                                                                                                                                                                    | Page No  | Line no             |
|------------------------------|---------|---------------------------------------------------------------------------------------------------------------------------------------------------------------------------------------------------|----------|---------------------|
| <b>Title and abstract</b>    | 1       | (a) Indicate the study's design with a commonly used term in the title or the abstract                                                                                                            | 1        | 7                   |
|                              |         | (b) Provide in the abstract an informative and balanced summary of what was done and what was found                                                                                               | 2        | 5-31                |
| <b>Introduction</b>          |         |                                                                                                                                                                                                   |          |                     |
| Background/rationale         | 2       | Explain the scientific background and rationale for the investigation being reported                                                                                                              | 3        | 9-17                |
| Objectives                   | 3       | State specific objectives, including any prespecified hypotheses                                                                                                                                  | 3        | 27-30               |
| <b>Methods</b>               |         |                                                                                                                                                                                                   |          |                     |
| Study design                 | 4       | Present key elements of study design early in the paper                                                                                                                                           | 3        | 34-41               |
| Setting                      | 5       | Describe the setting, locations, and relevant dates, including periods of recruitment, exposure, follow-up, and data collection                                                                   | 5        | 26                  |
|                              |         |                                                                                                                                                                                                   | 3        | 40-41               |
| Participants                 | 6       | (a) Give the eligibility criteria, and the sources and methods of selection of participants                                                                                                       | 4<br>3   | 40-42<br>34-41      |
| Variables                    | 7       | Clearly define all outcomes, exposures, predictors, potential confounders, and effect modifiers. Give diagnostic criteria, if applicable                                                          | 4        | 9-27                |
| Data sources/<br>measurement | 8*      | For each variable of interest, give sources of data and details of methods of assessment (measurement). Describe comparability of assessment methods if there is more than one group              | 4        | 9-27                |
|                              |         |                                                                                                                                                                                                   | 5        | 19-22               |
| Bias                         | 9       | Describe any efforts to address potential sources of bias                                                                                                                                         | 4        | 31-36               |
|                              |         |                                                                                                                                                                                                   | 4        | 41-42               |
| Study size                   | 10      | Explain how the study size was arrived at                                                                                                                                                         | 5        | 11-12               |
| Quantitative variables       | 11      | Explain how quantitative variables were handled in the analyses. If applicable, describe which groupings were chosen and why                                                                      | 4        | 9-27                |
| Statistical methods          | 12      | (a) Describe all statistical methods, including those used to control for confounding                                                                                                             | 5        | 16-22               |
|                              |         | (b) Describe any methods used to examine subgroups and interactions                                                                                                                               | 5        | 19-22               |
|                              |         | (c) Explain how missing data were addressed                                                                                                                                                       | 5        | 27-33               |
|                              |         | (d) If applicable, describe analytical methods taking account of sampling strategy                                                                                                                | NA       | NA                  |
|                              |         | (e) Describe any sensitivity analyses                                                                                                                                                             | NA       | NA                  |
| <b>Results</b>               |         |                                                                                                                                                                                                   |          |                     |
| Participants                 | 13*     | (a) Report numbers of individuals at each stage of study—eg numbers potentially eligible, examined for eligibility, confirmed eligible, included in the study, completing follow-up, and analysed | 5        | 26-35               |
|                              |         | (b) Give reasons for non-participation at each stage                                                                                                                                              | NA       | NA                  |
|                              |         | (c) Consider use of a flow diagram                                                                                                                                                                | 5        | Figure 1            |
| Descriptive data             | 14*     | (a) Give characteristics of study participants (eg demographic, clinical, social) and information on exposures and potential confounders                                                          | 5<br>6-7 | 39-43<br>Table 1, 2 |
|                              |         | (b) Indicate number of participants with missing data for each variable of interest                                                                                                               | 5        | 26-35<br>Figure 1   |
| Outcome data                 | 15*     | Report numbers of outcome events or summary measures                                                                                                                                              | 5        | 26-35               |

|                                                                                                                                        |                  |    |                                                                                                                                                                                                              |              |                                         |
|----------------------------------------------------------------------------------------------------------------------------------------|------------------|----|--------------------------------------------------------------------------------------------------------------------------------------------------------------------------------------------------------------|--------------|-----------------------------------------|
| 1<br>2<br>3<br>4<br>5<br>6<br>7<br>8<br>9<br>10<br>11                                                                                  | Main results     | 16 | (a) Give unadjusted estimates and, if applicable, confounder-adjusted estimates and their precision (eg, 95% confidence interval). Make clear which confounders were adjusted for and why they were included | NA           | NA                                      |
| 12<br>13<br>14                                                                                                                         |                  |    | (b) Report category boundaries when continuous variables were categorized                                                                                                                                    | NA           | NA                                      |
| 15<br>16<br>17<br>18<br>19<br>20<br>21<br>22                                                                                           |                  |    | (c) If relevant, consider translating estimates of relative risk into absolute risk for a meaningful time period                                                                                             | NA           | NA                                      |
| 23<br>24<br>25<br>26<br>27<br>28<br>29<br>30<br>31<br>32                                                                               | Other analyses   | 17 | Report other analyses done—eg analyses of subgroups and interactions, and sensitivity analyses                                                                                                               | 10           | 25-33                                   |
| <b>Discussion</b>                                                                                                                      |                  |    |                                                                                                                                                                                                              |              |                                         |
| 33<br>34<br>35<br>36<br>37                                                                                                             | Key results      | 18 | Summarise key results with reference to study objectives                                                                                                                                                     | 8<br>9<br>10 | 18-35<br>Figure 2<br>1-24<br>Figure 3-6 |
| 38<br>39<br>40<br>41<br>42<br>43<br>44<br>45<br>46<br>47<br>48<br>49<br>50<br>51<br>52<br>53<br>54<br>55<br>56<br>57<br>58<br>59<br>60 | Limitations      | 19 | Discuss limitations of the study, taking into account sources of potential bias or imprecision. Discuss both direction and magnitude of any potential bias                                                   | 11           | 15-25                                   |
|                                                                                                                                        | Interpretation   | 20 | Give a cautious overall interpretation of results considering objectives, limitations, multiplicity of analyses, results from similar studies, and other relevant evidence                                   | 13           | 15-19                                   |
|                                                                                                                                        | Generalisability | 21 | Discuss the generalisability (external validity) of the study results                                                                                                                                        | 12           | 12-25                                   |
| <b>Other information</b>                                                                                                               |                  |    |                                                                                                                                                                                                              |              |                                         |
|                                                                                                                                        | Funding          | 22 | Give the source of funding and the role of the funders for the present study and, if applicable, for the original study on which the present article is based                                                | NA           | NA                                      |

\*Give information separately for exposed and unexposed groups.

**Note:** An Explanation and Elaboration article discusses each checklist item and gives methodological background and published examples of transparent reporting. The STROBE checklist is best used in conjunction with this article (freely available on the Web sites of PLoS Medicine at <http://www.plosmedicine.org/>, Annals of Internal Medicine at <http://www.annals.org/>, and Epidemiology at <http://www.epidem.com/>). Information on the STROBE Initiative is available at [www.strobe-statement.org](http://www.strobe-statement.org).
